# Supplementary material for: Neurophysiological correlates of motor planning and movement initiation in ACL-reconstructed individuals: a case–control study
Source: PubMed Central journal article supplement — BMJ Open. 2018 Sep 19;8(9):e023048. doi: 10.1136/bmjopen-2018-023048 (PMC6150139; doi:10.1136/bmjopen-2018-023048), 2018-09-19
Supplement: bmjopen-2018-023048.draft_revisions.pdf [file bmjopen-2018-023048.draft_revisions.pdf]

# BMJ Open

BMJ Open is committed to open peer review. As part of this commitment we make the peer review history of every article we publish publicly available.

When an article is published we post the peer reviewers' comments and the authors' responses online. We also post the versions of the paper that were used during peer review. These are the versions that the peer review comments apply to.

The versions of the paper that follow are the versions that were submitted during the peer review process. They are not the versions of record or the final published versions. They should not be cited or distributed as the published version of this manuscript.

BMJ Open is an open access journal and the full, final, typeset and author-corrected version of record of the manuscript is available on our site with no access controls, subscription charges or pay-per-view fees (<http://bmjopen.bmj.com>).

If you have any questions on BMJ Open's open peer review process please email [info.bmjopen@bmj.com](mailto:info.bmjopen@bmj.com)

# BMJ Open

## Neurophysiological correlates of motor planning and movement initiation in ACL-reconstructed individuals: A case-control study

|                                                                                                                                                                                                                |                                                                                                                                                                                                                                                                                                                                                                                                                                                                                                                |
|----------------------------------------------------------------------------------------------------------------------------------------------------------------------------------------------------------------|----------------------------------------------------------------------------------------------------------------------------------------------------------------------------------------------------------------------------------------------------------------------------------------------------------------------------------------------------------------------------------------------------------------------------------------------------------------------------------------------------------------|
| Journal:                                                                                                                                                                                                       | <i>BMJ Open</i>                                                                                                                                                                                                                                                                                                                                                                                                                                                                                                |
| Manuscript ID                                                                                                                                                                                                  | bmjopen-2018-023048                                                                                                                                                                                                                                                                                                                                                                                                                                                                                            |
| Article Type:                                                                                                                                                                                                  | Protocol                                                                                                                                                                                                                                                                                                                                                                                                                                                                                                       |
| Date Submitted by the Author:                                                                                                                                                                                  | 23-Mar-2018                                                                                                                                                                                                                                                                                                                                                                                                                                                                                                    |
| Complete List of Authors:                                                                                                                                                                                      | Giesche, Florian; Goethe University Frankfurt/Main, Department of Sports Medicine<br>Engeroff, Tobias; Goethe University Frankfurt/Main, Department of Sports Medicine<br>Wilke, Jan; Goethe University Frankfurt/Main, Department of Sports Medicine<br>Niederer, Daniel; Goethe University Frankfurt/Main, Department of Sports Medicine<br>Vogt, Lutz; Goethe University Frankfurt/Main, Department of Sports Medicine<br>Banzer, Winfried; Goethe University Frankfurt/Main, Department of Sports Medicine |
| Keywords:                                                                                                                                                                                                      | ACL rupture, neuromuscular function, cortical activity, neurocognition, neuroplasticity, central nervous system modifications                                                                                                                                                                                                                                                                                                                                                                                  |
| <p>Note: The following files were submitted by the author for peer review, but cannot be converted to PDF. You must view these files (e.g. movies) online.</p> <p>Supplementary file - video 0.5 speed.mp4</p> |                                                                                                                                                                                                                                                                                                                                                                                                                                                                                                                |

SCHOLARONE™  
Manuscripts

1  
2  
3 1 *Neurophysiological correlates of motor planning and movement*  
4  
5 2 *initiation in ACL-reconstructed individuals: A case-control study*  
6

7  
8  
9  
10 4 Florian Giesche, Tobias Engeroff, Jan Wilke, Daniel Niederer, Lutz Vogt, Winfried Banzer  
11  
12 5 Department of Sports Medicine, Goethe University Frankfurt, Frankfurt/ Main, Germany  
13

14  
15  
16 7 Corresponding author:

17  
18 8 Florian Giesche

19  
20 9 Department of Sports Medicine, Goethe University Frankfurt,

21  
22  
23 10 Ginnheimer Landstraße 39; 60487 Frankfurt/ Main, Germany  
24

25 11 T: +49 (0)69 798 244 82

26  
27 12 F: +49 (0)69 798 24592  
28

29 13 E-Mail: [giesche@sport.uni-frankfurt.de](mailto:giesche@sport.uni-frankfurt.de)  
30

31 14

32  
33 15

34  
35 16 Word count: 3.315  
36  
37  
38  
39  
40  
41  
42  
43  
44  
45  
46  
47  
48  
49  
50  
51  
52  
53  
54  
55  
56  
57  
58  
59  
60

## Abstract

**INTRODUCTION:** Current evidence suggests that the loss of mechanoreceptors after anterior cruciate ligament (ACL) tears might be compensated by increased cortical motor planning. This occupation of cerebral resources may limit the potential to quickly adapt movements to unforeseen external stimuli in the athletic environment. To date, studies investigating such neural alterations during movement focused on simple, anticipated tasks with poor ecological validity. This trial, therefore, aims to investigate the cortical and biomechanical processes associated with sport- and injury-related movements in ACL-reconstructed individuals.

**METHODS AND ANALYSIS:** ACL-reconstructed participants and uninjured controls will perform repetitive counter-movement jumps with single-leg landings. Two different conditions are to be completed: anticipated (n = 35) vs. non-anticipated (n = 35) landings. Under the anticipated condition, participants receive the visual information depicting the requested landing leg prior to the jump. In the non-anticipated condition, this information will be provided about 400 ms prior to landing. Neural correlates of motor planning will be measured using electroencephalography. In detail, movement-related cortical potentials, frequency spectral power, and functional connectivity will be assessed. Biomechanical landing quality will be captured via a capacitive force plate. Calculated parameters encompass time to stabilization, vertical peak ground reaction force and center of pressure path length. Potential systematic differences between ACL-reconstructed individuals and controls will be identified in dependence of jumping condition (anticipated, non-anticipated, left and right landing leg and rest) by using interference statistics. In Potential associations between the cortical and biomechanical measures will be calculated by means of correlation analysis. In case of statistical significance ( $\alpha < .05$ .) further confounders (cofactors) will be considered.

**ETHICS AND DISSEMINATION:** The independent Ethics Committee of the University of Frankfurt (Faculty of Psychology and Sport Sciences) approved the study. Publications in peer-reviewed journals are planned. The findings will be presented at scientific conferences.

**PROTOCOL REGISTRATION NUMBER:** NCT03336060 (ClinicalTrials.gov)

**Keywords:** ACL rupture, neuromuscular function, cortical activity, neurocognition, neuroplasticity, central nervous system modifications

## 43 Article Summary

### 44 Strengths and limitations of this study

- 45 • First-time investigation of the link between electrocortical (EEG) activity (neural correlates of  
46 motor planning) and biomechanical function during typical sport- and injury-related movements  
47 (single-leg landings) in ACL-reconstructed individuals.
- 48 • Association between increased use of motor planning capacities and lower postural control during  
49 landing in ACL-reconstructed individuals may have major implications for rehabilitation and  
50 return to sports.
- 51 • Comparison against both, unaffected leg of the ACL-reconstructed individuals as well as  
52 uninjured controls and rigorous control of relevant confounders (e.g. higher and lower level  
53 cognitive functions).
- 54 • Investigator and participant blinding is not possible.

## 57 1. Introduction

58 Anterior cruciate ligament (ACL) tears represent the most frequent injury of the knee, particularly  
59 among young, physically active individuals[1, 2]. The disorder represents the leading cause of sports-  
60 related surgery[3] and, besides the severe acute and long-term consequences (e.g. pain, functional  
61 disability and impairments)[4], is associated with a higher lifetime risk of knee osteoarthritis[5].  
62 Despite several multidisciplinary therapeutic approaches aiming to restore preinjury neuromuscular  
63 function, the odds of sustaining a second tear are significantly increased in afflicted individuals who  
64 returned to sports[6, 7]. It may be inferred that current rehabilitation paradigms fail to eliminate all  
65 impairments of the injury[8, 9].

66 The ACL rupture is, besides affecting mechanical stability, associated with substantial destructions of  
67 ligament mechanoreceptors[10]. These afferences, such as the Ruffini and Pacini corpuscles located in  
68 the ACL capable of providing proprioceptive information[11–13] regulate the activity of the  
69 Hamstring muscles[14–16]. As they represent a synergist of the ACL the Hamstrings are paramount

1  
2  
3 70 for functional stability of the knee joint[17, 18]. As the neural drive to the muscle depends on the  
4  
5 71 sensory input, the above described peripheral deafferentation (mechanoreceptor damage), secondary to  
6  
7 72 the rather acute consequences of the injury (e.g. pain, swelling and inflammation), even induce  
8  
9 73 potentially neuroplastic changes in the brain[19, 20].

10  
11 74 Current evidence suggests persistent central nervous system (CNS) adaptations occurring after  
12  
13 75 ligamentous injuries and subsequent reconstruction surgeries[21]. Electroencephalographic (EEG)  
14  
15 76 studies revealed increased activity of the frontal[22] and frontoparietal cortex[23] during the execution  
16  
17 77 of sensorimotor tasks in ACL-reconstructed compared to unimpaired individuals. The authors  
18  
19 78 conclude that this may be related to increased attentional control and somatosensory information  
20  
21 79 processing related to a higher working memory load. Similarly, neuroimaging studies demonstrated  
22  
23 80 ACL-injured individuals to exhibit a higher recruitment of cortical areas responsible for motor  
24  
25 81 planning, sensory processing and visual-motor control during the execution of repetitive knee  
26  
27 82 extensions[24, 25]. It may be concluded that the brain of ACL-injured and -reconstructed individuals  
28  
29 83 relies more on higher-order motor control areas[26] and executive function even during simple,  
30  
31 84 feedback-controlled movements, such as joint repositioning[23], force matching tasks[22] and knee  
32  
33 85 extensions [8, 25] in order to compensate the reduced sensory input[21, 25, 27].

34  
35  
36 86 While the consequences of this supraspinal compensation strategy may be invisible during performing  
37  
38 87 activities of daily living, they may place an athlete at risk of injury during sports and competition. To  
39  
40 88 maintain neuromuscular control in a complex and dynamic athletic environment, a constant interaction  
41  
42 89 between intrinsic (e.g. motor planning, joint position and movement) and extrinsic factors (e.g. other  
43  
44 90 players, ball and non-anticipated stimuli) is required, based on the simultaneous integration and  
45  
46 91 processing of varying proprioceptive, visual and vestibular information[8, 28–30]. In most situations  
47  
48 92 leading to an injury, athletes are required to quickly adapt to the changing environment and cannot  
49  
50 93 exclusively rely on pre-planned, anticipated movements[28, 29]. This, inter alia, refers to single-leg  
51  
52 94 jump landings, which have been demonstrated to represent one of the major causes for non-contact  
53  
54 95 knee injuries[31, 32].

1  
2  
3 96 To date, studies investigating the cortical alterations during movement of ACL patients focussed on  
4  
5 97 simple, anticipated tasks mainly requiring feedback control and assesses in sitting or lying  
6  
7 98 position[22–25]. Those tasks have poor ecological validity. Evidence is thus scarce regarding typical  
8  
9 99 sport- and injury-related movements characterized by time constraints and feedforward control. The  
10  
11 100 trial, therefore, aims to gain further insight into the cortical and biomechanical processes associated  
12  
13 101 with non-anticipated/ unforeseen single-leg jump landings in ACL-reconstructed individuals and  
14  
15 102 healthy controls. Specifically, the hypothesis will be tested that, in ACL-reconstructed individuals  
16  
17 103 compared to unimpaired individuals, increased motor planning occurs occupying cerebral resources,  
18  
19 104 which will no longer be available to ensure stable landings.  
20  
21 105

## 23 106 **2. Methods**

### 26 107 **2.1 Study design and ethical standard**

28 108 An explorative case-control study will be conducted. The trial will be carried out according to the  
29  
30 109 Guidelines for Good Clinical Practice and according to the Declaration of Helsinki, including its  
31  
32 110 modification of Fortaleza. Ethical approval has been obtained by the local committee of the university  
33  
34 111 (Ethics Committee of the Faculty of Psychology and Sport Sciences, Goethe University Frankfurt,  
35  
36 112 Germany, reference no: 2017/27) and all participants provide written informed consent. The study has  
37  
38 113 been prospectively registered at clinicaltrials.gov (NCT03336060).  
39  
40 114

### 42 115 **2.2 Study setup**

44 116 After study enrollment, each individual will be scheduled for two visits within one week (Figure 1). At  
45  
46 117 visit 1, potential confounders are assessed. Subsequently, participants will be familiarized with the  
47  
48 118 anticipated and non-anticipated jump-landing tasks of the study. At visit 2, the main measurements are  
49  
50 119 performed. Both visits will take place at comparable time of day.  
51  
52 120

### 54 121 **Figure 1**

55 122

57 123

### 124 **2.3 Sample**

125 Recruited participants will be ACL-reconstructed (cases) and healthy, uninjured individuals (controls).

126 All participants will be recruited at local physical rehabilitation centres, physiotherapists and medical  
127 practices, sports clubs, fitness centres, and the local university's sports campus by means of flyers, e-  
128 mails and personal addressing. Inclusion criteria for all participants are (1) male sex, (2) age between  
129 20 and 40 years, and (3) engagement in regular physical activity. Cases will be included if they have a  
130 history of unilateral, anterior cruciate ligament rupture with reconstruction surgery (> 1 year),  
131 irrespective of the replacement plastic and surgical access. The following exclusion criteria will be  
132 applied:

- 133     ▪ exorbitant concomitant knee injury (i.e. bone bruise grad 3 or 4, full-thickness articular  
134     cartilage lesion larger than 1 cm<sup>2</sup>, "unhappy triad") (cases)
- 135     ▪ previous ACL-injury or surgery of the uninvolved knee (cases)
- 136     ▪ life-quality impairing somatic/ psychological diseases/ disorders (all participants)
- 137     ▪ acute or chronic inflammation of the musculoskeletal system / lower extremity (all  
138     participants)
- 139     ▪ medication modifying pain perception and proprioception (all participants)
- 140     ▪ muscle soreness (all participants)
- 141     ▪ any severe musculoskeletal injury of the lower limb (controls)

### 143 **2.4 Patient and Public Involvement**

144 Patients will be not involved in this study: We only include ACL-reconstructed individuals (minimum  
145 one year after surgery) who have returned to their initial daily, physical and sportive activities and  
146 have restored their neuromuscular performance of the injured lower leg indicated by a side symmetry  
147 of single leg hop for distance testing above 85 percent.

### 149 **2.5 Experimental approach**

150 All participants will perform repetitive counter-movement jumps (hands placed at the hip) with single  
151 leg landings. Two different conditions are to be completed: anticipated vs. non-anticipated landings.



1  
2  
3 152 For the anticipated condition, the participants receive a visual information depicting the requested  
4  
5 153 landing leg prior to the jump. In the non-anticipated condition, this information will be provided only  
6  
7 154 after take-off. After a brief standardised warm-up (30 jumping jacks) and three test jumps, all  
8  
9 155 participants have to perform a total of 70 successful jumps (n = 35 per condition, in randomized  
10  
11 156 order), using the above described paradigm (for details, refer to Figure. 3 and 4).

12  
13 157 The indication of the requested landing leg will be delivered by means of a laptop screen (17 inch  
14  
15 158 diameter). It is positioned at 2.5 meters distance in front of the participants (Figure2). On the screen, a  
16  
17 159 slide (Microsoft PowerPoint 2010) with a left or right footprint located on the left or right side of a  
18  
19 160 vertical line is shown (Figure 2). In anticipated trials, the slide indicating the landing leg will be  
20  
21 161 presented constantly before take-off (for details, refer to Figure 3). For the non-anticipated jumps, a  
22  
23 162 single button USB switch (120 ms delay; KKmoon; South Africa) connected to the laptop will be used  
24  
25 163 in order to elicit a slide change from the fixation cross to the landing leg slide upon take-off (for  
26  
27 164 details, refer to Figure 4; supplementary file – Video).

28  
29 165  
30  
31 166 **Figure 2, 3, 4**

32  
33 167  
34  
35 168 A successful jump is defined as holding a stable landing position for at least 10 seconds. The  
36  
37 169 participants will be allowed to use their arms to equilibrate the postural sway immediately after  
38  
39 170 landing. After landing, their hands need to be re-positioned on the hip, while focussing a cross on the  
40  
41 171 wall at eye level. Unsuccessful trials are categorised as landing errors (touching the ground with the  
42  
43 172 free leg, leaving the force plate, touching the ground with the hands and falls) and/or task errors  
44  
45 173 (landing on the wrong foot). To prevent excessive exhaustion during the experiment, the 70 jumps will  
46  
47 174 be stratified into blocks of 10 with 5-minutes rests (sitting position) in between. Randomised selection  
48  
49 175 of the jump conditions will be performed using BIAS for windows (University Frankfurt, Germany,  
50  
51 176 Version 11.06).

52  
53 177 Previous pilot testing revealed longer flight times for non-anticipated jump-landings compared to  
54  
55 178 anticipated landings. Therefore, two strategies will be used to ensure uniform flight durations between  
56  
57 179 the two disposed conditions. Firstly, during the familiarisation session, the participants will be trained

1  
2  
3 180 to constantly achieve comparable flight times of 480 to 520 milliseconds regardless of the jump  
4  
5 181 condition. This duration, corresponding to a jumping height of about 30 cm, was chosen because the  
6  
7 182 button switch has a latency of 120 ms from release to slide appearance and because other similar trials  
8  
9 183 have used flight times of 400 ms[33, 34]. Secondly, in addition to the task familiarisation, during the  
10  
11 184 breaks of the actual experiment, the participants will be provided with feedback regarding the achieved  
12  
13 185 flight heights.  
14  
15 186

## 16 17 187 **2.6 Measurements**

18  
19 188 Cortical measures of motor planning and preparation affordances serve as the main outcome of the  
20  
21 189 trial. They were assessed prior to jumping. To ensure self-initiated movements the start of the jump is  
22  
23 190 not triggered to an external stimulus in both jump-landing conditions. To reduce artefacts generated by  
24  
25 191 eye movements, participants are asked to fixate the cross (Figure 3 and 4) shown on the laptop screen  
26  
27 192 prior to jumping.  
28  
29 193

### 30 31 194 2.6.1 Cortical activity

32  
33 195 Brain activity prior to jump movement initiation will be captured using a 32-channel  
34  
35 196 electroencephalography (EEG) system with a wireless amplifier (LiveAmp, BrainProducts, Gilching,  
36  
37 197 Germany). The device samples data at a frequency of 500 Hz (24-bit analog-to-digital) and has an  
38  
39 198 integrated 3-axis acceleration sensor (measurement range:  $\pm 2$  g, Resolution: 1 mg/bit, 12 Bit; Error:  $\pm$   
40  
41 199 0.2 g). It is carried in a custom-made backpack, which is placed attached to the upper back of the  
42  
43 200 participants. Positioning of the active slim electrodes embedded in the EEG cap (actiCAP, EasyCap,  
44  
45 201 Herrsching, Germany) will be performed according to the 10-20 international system. Impedance will  
46  
47 202 be kept below 5 k $\Omega$  and no online filters will be applied.

48  
49 203 The EEG signal will be recorded throughout the whole jump landing experiment. In addition, EEG  
50  
51 204 data will be collected during 2-minute sitting rests prior to and after the 70 jumps. To reduce artefacts  
52  
53 205 resulting from eye movement before and after the jump-landing experiments as well as during these  
54  
55 206 measurements at rest, the participants will be instructed to fixate a cross, which is displayed on the  
56  
57 207 laptop screen.  
58  
59  
60

1  
2  
3 208 Three EEG parameters will be analysed: *Movement-related cortical potentials, frequency power*  
4 209 *spectra and functional connectivity*. The **Movement-related cortical potentials** (MRCP) occur about  
5  
6 210 two seconds prior to voluntary movement and can be subdivided into successive three parts that will  
7  
8 211 be assessed in the planned trial: *Bereitschaftspotential - negative slope - motor potential*[35, 36] (for a  
9  
10 212 review see[37]). The *Bereitschaftspotential* is a slowly rising, bilateral negativity, generated in the  
11  
12 213 supplementary and pre-supplementary motor area (1.5 to 0.5 seconds before movement onset; [38,  
13  
14 214 39]). Subsequently, a steeper negativity, the *negative slope* occurs and relates to the activity of the  
15  
16 215 contralateral primary motor cortex (starting about 0.5 seconds prior to movement onset;[36, 40]). Both  
17  
18 216 signals are followed by the *motor potential*[39], the peak negativity corresponding to the movement  
19  
20 217 onset itself[41, 42]. MCRP are thought to reflect the motor cortical involvement during motor  
21  
22 218 planning and preparing of a self-initiated movement[40]. For each of the MRCP measures, acceptable  
23  
24 219 test-retest reliability has been reported [43].

25  
26 220 To investigate the attentional and working memory processes needed for initiating and executing the  
27  
28 221 jumps different **frequency power spectra** (Theta, Beta and Alpha) will be captured for frontal, central  
29  
30 222 and parietal brain areas. Theta power will be measured in the frontal cortex and increases with higher  
31  
32 223 levels of focused attention[44]. Alpha-2 power; inversely related to the activation[45] of the  
33  
34 224 underlying somatosensory cortex, decreases with higher demands of sensory information-processing  
35  
36 225 during sensorimotor tasks[23]. Both frontal Theta and parietal Alpha-2 have been shown to be  
37  
38 226 strongly associated with working memory load[46]. It is, furthermore, well-known that the planning  
39  
40 227 and preparation of voluntary movements are accompanied by an event-related desynchronization[47,  
41  
42 228 48] of the alpha and beta (including sensorimotor rhythm[49]) frequencies power corresponding to the  
43  
44 229 cortical sensorimotor and parietal areas[50–54]. EEG power measures have been demonstrated to be  
45  
46 230 highly reliable during both rest[55] and sensorimotor tasks[56].

47  
48 231 Coherence analyses will be applied to examine the **functional connectivity** between the brain region  
49  
50 232 specific co-working processes (motor planning areas, fronto-parietal network[46]). Following the  
51  
52 233 approach of Sauseng et al.[46] and Silva et al.[57] coherence analysis will be conducted for the above  
53  
54 234 mentioned frequency bands (e.g. Theta, Beta and Alpha). The test-retest-reliability of coherence  
55  
56 235 testing has been shown to be sufficient to high for most brain areas and frequency bands[58].  
57  
58  
59

236

237

### 238 2.6.2 Biomechanical parameters

239 A capacitive force measurement platform (50 Hz, Zebris FDM, Zebris Medical GmbH, Isny,  
240 Germany) will be used to assess postural stability following the single leg landings. Three parameters  
241 will be investigated *Time to stabilisation (TTS)* - *Vertical peak ground reaction force (GRF)* - *Center  
242 of pressure (COP) path length*: **Time to stabilisation (TTS)** describes the capacity to regain a stable  
243 stance as quickly as possible. It will be computed according to Colby et al.[59] and Wikstrom et  
244 al.[60]. Here, the dynamic cumulative average weight is calculated, based on the continuous force  
245 plate recordings until 10 seconds after landing. A stable stance is assumed as soon as the sequential  
246 average no longer exceeds the threshold of .25 standard deviations of the overall mean ground vertical  
247 force. The TTS has been demonstrated to exhibit moderate to high reliability[61]. **Vertical peak  
248 ground reaction force (GRF)** is the maximal vertical force impact upon landing. Using the raw data,  
249 the highest value [Newton] will be identified. **Center of pressure (COP) path length** represents the  
250 absolute cumulative sway of the total covered distance by the COP during the trial duration[62]. The  
251 path length will be assessed up until 2.5 seconds after the initial ground contact, which corresponds to  
252 the duration of the early dynamic landing phase[63]. In terms of balance assessment, COP measures  
253 have been demonstrated satisfactory reliability[64]. Intraindividually minima will be calculated for the  
254 both TTS, peak GRF, and COP path length in dependence of the disposed conditions.

255

### 256 2.6.3 Potential cofactors

257 The following parameters, potentially affecting the biomechanical and cortical outcomes, will be  
258 assessed:

- 259 - Dynamic stability feed-forward performance of the lower limb (Single leg hop for distance[65]).
- 260 - Postural control during single-leg stance (capacitive force measurement plate Zebris PDMS,  
261 Zebris, Isny, Germany)
- 262 - Limb alignment in frontal plane evaluated by using Single-Leg Landing Error Scoring  
263 System[66]

- 1  
2  
3 264 - Higher and lower level cognitive function (for details, see Table 1 and table 2)  
4  
5 265 - Level of arousal and alertness (10 cm VAS)  
6  
7 266 - Self-reported knee function (Lysholm Knee Score Scale;[67])  
8  
9 267 - Self-reported perceived fatigue of the lower limbs (10 cm VAS)  
10  
11 268 - Kinesiophobia, or fear of movement/ (re-)injury (Tampa Scale for Kinesiophobia;[68])  
12  
13 269 - Task-specific fear of movement/reinjury (10 cm VAS)  
14  
15 270 - Risk-taking behaviour (domain-specific risk-taking/ DOSPERT scale)  
16  
17  
18  
19  
20  
21  
22  
23  
24  
25  
26  
27  
28  
29  
30  
31  
32  
33  
34  
35  
36  
37  
38  
39  
40  
41  
42  
43  
44  
45  
46  
47  
48  
49  
50  
51  
52  
53  
54  
55  
56  
57  
58  
59  
60

**Table 1** gives an overview about the measures which are used to assess lower cognitive functions

| Cognitive function                 | Measure                   | Format          | Description                                                                                                                                                              | Primary Outcomes                        |
|------------------------------------|---------------------------|-----------------|--------------------------------------------------------------------------------------------------------------------------------------------------------------------------|-----------------------------------------|
| Visuoperceptual abilities          | Trail Making Test – A[69] | Pen/ paper      | Link 25 disordered circles (number 1 to 25) in ascending order                                                                                                           | Speed [s]                               |
| Reaction time/ speed of processing | Detection Task[70]        | Computer-based* | Simple reaction time: attend to back side of playing card (screen), press predefined key when card turns to front side, 25 correct responses or max. 2 min.              | Response time in correct responses [ms] |
|                                    | Identification Task[70]   | Computer-based* | Choice reaction time: attend to back side of playing card (screen), press one of two predefined keys according to colour (black or red) of front side of the turned card | Response time in correct responses [ms] |

\*Part of the neuropsychological, computerized test battery (CogState Ltd., Melbourne, Australia)

**Table 2** gives an overview about the measures which are used to assess higher cognitive functions

| Cognitive function                          | Measure                        | Format          | Description                                                                                                                                                                                                                                                                                                                                                                                                                                                                                  | Primary Outcomes                                                                                           |
|---------------------------------------------|--------------------------------|-----------------|----------------------------------------------------------------------------------------------------------------------------------------------------------------------------------------------------------------------------------------------------------------------------------------------------------------------------------------------------------------------------------------------------------------------------------------------------------------------------------------------|------------------------------------------------------------------------------------------------------------|
| Working memory                              | One back test[70]              | Computer-based* | Attend to back side of playing card (screen), press one of two predefined keys, one key when turned card is same as immediately previous one, another key if not, 42 trials or max. 3 min.                                                                                                                                                                                                                                                                                                   | Correct responses (% of total trials)                                                                      |
|                                             | Verbal digit span test[71]     | Verbal          | <b>Forward condition:</b> examiner read single digits, participant repeat in same order, 1 block of 2 different digit spans with same number of digits (start with 3 digits), one digit is added if one of both is repeated correctly (max. 8 digits); <b>Backward condition:</b> participant repeat readed digits in contrariwise order (start with 2, max. 7 digits)                                                                                                                       | Correct repeated digit spans [n]                                                                           |
| Spatial working memory, learning efficiency | Groton Maze Learning Test [72] | Computer-based* | 10 x 10 grid of squares (maze), start: top left corner, finish: bottom right corner (flag); goal: move to flag by clicking squares, if correct (green check mark appears), if not correct (red cross appears); 1 practice trial to learn pathway, 3 experimental trials in which the learned pathway has to be repeated                                                                                                                                                                      | Accuracy (total number of errors during three trials) and speed (time)                                     |
| Visual memory                               | One card learning Test[70]     | Computer-based* | Attend to back side of playing card (screen), cards turned in succession, press one predefined key if shown card has already appeared before, another key if not; 3 sequences (42 responses) or max. 3 min.                                                                                                                                                                                                                                                                                  | Accuracy (errors) and speed (time)                                                                         |
| Cognitive flexibility                       | Trail Making Test – B[69]      | Pen and paper   | Link both disordered numbers (1–13) and letters (A–L) in alternating and ascending order (i.e., 1-A-2-B-3-C-4-D, etc.)                                                                                                                                                                                                                                                                                                                                                                       | TMT difference = TMT-B [s] – TMT-A [s]                                                                     |
| Response inhibition                         | Stop-Signal-Task[73]           | Computer-based  | Primary task: pressing one of two predefined keys according to two visual stimuli (75% of trials)<br>Additional task: primary-task stimulus followed by tone (variable delay), indicating response to visual stimuli has to be avoided (stop-signal trials; 25% of the trials randomly selected).                                                                                                                                                                                            | mean stop signal reaction time [ms],<br>accuracy of responses to no-signal trials (% of correct responses) |
| Response interference control               | Stroop Colour-Word task[74]    | Visual (sheet)  | Familiarisation trials: read one sheet (3 columns) of words of colours (colour-words) printed in black ink (word reading; Stroop I), read colour-words printed in different colours (colour naming; Stroop II)<br>Experimental trial: colour-words are printed in inconsistent colour ink (i.e. the word “green” is printed in blue ink), name the colour ink in which the colour-word is printed and not the word (i.e. the word “green” is printed in blue ink; interference; Stroop III). | Interference score = ‘Stroop III – [(Stroop I + Stroop II) / 2]                                            |

\*Part of the neuropsychological, computerized test battery (CogState Ltd., Melbourne, Australia)

## 1 2.7 EEG data processing

2 All EEG data will be filtered with a Butterworth high-pass filter of .001 Hz (24 dB/octave) and a low-  
3 pass filter of 40 Hz (24 dB/octave). For movement onset detection, the accelerometer data of the  
4 amplifier are used. In each jump trial, the EEG signals will be segmented into epochs of 2500 ms,  
5 from 2.000 ms before to 500 ms after movement onset. Components which are associated with eye  
6 movements and blinks will be removed by using Independent Component Analysis according to[75].

7 Trials with remaining artefacts will be rejected and only artefact-free trials will be used for analysis.

8 Time-domain specific analysis will be conducted to investigate the MRCP prior each jump. According  
9 to Spring et al.[41], MRCP will be divided into 3 successive epochs as follows: The  
10 Bereitschaftspotential divided in an early (BP-1: -1.500 to -1.000 ms) and late component (BP-2: -  
11 1.000 to -500 ms), and the negative slope component (-500 ms to 0 ms), including the motor potential.

12 The mean and peak activity as well as onset time of the MRCP will be calculated primarily for the  
13 fronto-central (FC1, FC2) and central electrodes (C3, Cz, C4) as these channels correspond mainly to  
14 the supplementary and primary motor areas.

15 Frequency domain (spectral) analysis will be conducted by means of Fast Fourier Transformation  
16 dividing artefact-free epochs into the frequency power spectra for both measurement at rest  
17 (continuous EEG) and during the jump landing experiment. For the latter, in terms of time-frequency  
18 analysis, the 1.5 second EEG prior to movement onset will be separated into three successive 0.5  
19 second epochs: -1.500 ms to -1.000 ms (T1), -1.000 s to -500 ms (T2) and -500 ms to 0 ms (T3).

20 According to the literature, the mean frequency power will be mainly analysed for the frontal theta  
21 (Fz;[76]), central beta (C3, Cz, C4) and parietal alpha-2 (P3, Pz, P4). Finally, to examine functional  
22 connectivity, coherence analysis in the respective frequency bands will be applied[77]. All  
23 electrocortical outcomes will be calculated for each condition (anticipated/ non-anticipated,  
24 injured/non-injured leg). The EEG at rest measurements will be serve as control condition. All EEG  
25 data processing will be applied by using the BrainVision Analyzer software (Brain Products, Gilching,  
26 Germany)

27

28

29

## 30 **2.7 Statistics**

31 All calculations will be performed after checking the underlying assumptions for parametric or  
32 nonparametric testing (Shapiro-Wilk normality test for testing of normal distribution, Levene-test for  
33 variance homogeneity testing). The EEG outcome measures will be transformed to normalize  
34 distributions by using logarithmic based or arcsine transformation, if indicated. Data will be reported  
35 descriptively as means, standard deviations, and 95 % confidence intervals. Potential systematic  
36 differences between cases and controls (between-subject factors) and within both groups (within-  
37 subject factors) will be identified in dependence of jumping condition (anticipated, non-anticipated,  
38 left and right landing leg and rest) by using interference statistics. Potential associations between  
39 cortical activity measures and landing biomechanics will be calculated by using correlation analysis. If  
40 statistical associations occur, further confounders are introduced and considered by means of cofactor  
41 analysis. The level of statistical significance is set to  $\alpha < .05$ . Based on the exploratory nature of this  
42 study no alpha-error adjustment will be performed for multiple hypotheses testing. Microsoft Excel  
43 2010 for Windows and SPSS Statistics (version 22.0, SPSS Inc., Chicago, IL, USA) will be used for  
44 statistical data analysis.

45

## 46 **3. Discussion**

47 To the best of our knowledge, the planned study is the first to explore both, the cortical and  
48 biomechanical fundamentals underlying non-anticipated single-leg landings in ACL-reconstructed  
49 individuals. Hence, this study will provide the first evidence concerning neural correlates of motor  
50 planning within sport- and injury-relevant movement paradigms.

51 Another strength of our design consists in the standardized assessment of relevant confounders  
52 potentially influencing the chosen outcomes. This, particularly, relates to higher and lower level  
53 cognitive functions, which have been identified to be associated with athletic performance (e.g. ball  
54 game sports[78, 79]) as well as knee injury risk[80] and incidence[81–83]

55 Our study will reveal results relevant for practice. If the hypothesized association between increased  
56 use of motor planning capacities and lower postural control during landing are verified, this would



1  
2  
3 57 have major implications for rehabilitation. Three key aspects may be of particular relevance: Above all  
4  
5 58 (1), an increased reliance on motor planning during athletic high-risk situations could represent a new  
6  
7 59 factor predisposing for ACL (re-)injury. Future prospective observational studies may therefore  
8  
9 60 include non-anticipated jump-landing tasks in order to elucidate its value in predicting injury and  
10  
11 61 monitoring the return to play / return to sports process.

12  
13 62 Another issue (2) relates to the elaboration of new training approaches. In addition to physical  
14  
15 63 exercise, e.g. dynamic balance, dual/-multi task training approaches (including external focus) and  
16  
17 64 visual-motor exercise paradigms[8], electrophysiological methods, such as neuromuscular electrical  
18  
19 65 stimulation[84], transcutaneous electrical nerve stimulation[85], electromyography biofeedback[86]  
20  
21 66 and transcranial magnet stimulation[87] may represent intriguing options to restore somatosensory  
22  
23 67 function and quadriceps corticomotor excitability of ACL-reconstructed individuals. Their application  
24  
25 68 may open new therapeutic avenues, if changes in motor planning prior to non-anticipated jump  
26  
27 69 landings could be evidenced in the cases.

28  
29 70 Finally (3), affordable devices for daily practice would be needed to assess an individuals' ability to  
30  
31 71 react and properly adjust his motor plan to an unforeseen/ non-anticipated external visual stimulus.

32  
33 72 Despite the promising approach, some limitations have to be taken into account. No investigator nor  
34  
35 73 participant blinding is possible using a quasi-experimental approach. Moreover, the neural correlates  
36  
37 74 of motor planning are only detectable prior to the jump, but not after take-off due to serious EEG  
38  
39 75 artefacts caused by the jump.

## References

- 1 Arna Risberg M, Lewek M, Snyder-Mackler L. A systematic review of evidence for anterior cruciate ligament rehabilitation: How much and what type? *Physical Therapy in Sport* 2004;5(3):125–45.
- 2 Spindler KP, Wright RW. Clinical practice. Anterior cruciate ligament tear. *N Engl J Med* 2008;359(20):2135–42.
- 3 Joseph AM, Collins CL, Henke NM, et al. A multisport epidemiologic comparison of anterior cruciate ligament injuries in high school athletics. *J Athl Train* 2013;48(6):810–17.
- 4 Risberg MA, Holm I, Tjomsland O, et al. Prospective study of changes in impairments and disabilities after anterior cruciate ligament reconstruction. *The Journal of orthopaedic and sports physical therapy* 1999;29(7):400–12.
- 5 Khan T, Alvand A, Prieto-Alhambra D, et al. ACL and meniscal injuries increase the risk of primary total knee replacement for osteoarthritis: A matched case-control study using the Clinical Practice Research Datalink (CPRD). *Br J Sports Med* 2018.
- 6 Paterno MV, Rauh MJ, Schmitt LC, et al. Incidence of Second ACL Injuries 2 Years After Primary ACL Reconstruction and Return to Sport. *Am J Sports Med* 2014;42(7):1567–73.
- 7 Wiggins AJ, Grandhi RK, Schneider DK, et al. Risk of Secondary Injury in Younger Athletes After Anterior Cruciate Ligament Reconstruction: A Systematic Review and Meta-analysis. *Am J Sports Med* 2016;44(7):1861–76.
- 8 Grooms D, Appelbaum G, Onate J. Neuroplasticity following anterior cruciate ligament injury: A framework for visual-motor training approaches in rehabilitation. *The Journal of orthopaedic and sports physical therapy* 2015;45(5):381–93.
- 9 Pelletier R, Higgins J, Bourbonnais D. Is neuroplasticity in the central nervous system the missing link to our understanding of chronic musculoskeletal disorders? *BMC Musculoskeletal Disord* 2015;16:25.
- 10 Dhillon MS, Bali K, Prabhakar S. Differences among mechanoreceptors in healthy and injured anterior cruciate ligaments and their clinical importance. *Muscles Ligaments Tendons J* 2012;2(1):38–43.
- 11 Dhillon MS, Bali K, Prabhakar S. Proprioception in anterior cruciate ligament deficient knees and its relevance in anterior cruciate ligament reconstruction. *Indian J Orthop* 2011;45(4):294–300.
- 12 Schultz RA, Miller DC, Kerr CS, et al. Mechanoreceptors in human cruciate ligaments. A histological study. *J Bone Joint Surg Am* 1984;66(7):1072–76.
- 13 Çabuk H, Kuşku Çabuk F. Mechanoreceptors of the ligaments and tendons around the knee. *Clin Anat* 2016;29(6):789–95.
- 14 Tsuda E, Okamura Y, Otsuka H, et al. Direct evidence of the anterior cruciate ligament-hamstring reflex arc in humans. *Am J Sports Med* 2001;29(1):83–87.
- 15 Tsuda E, Ishibashi Y, Okamura Y, et al. Restoration of anterior cruciate ligament-hamstring reflex arc after anterior cruciate ligament reconstruction. *Knee Surg Sports Traumatol Arthrosc* 2003;11(2):63–67.
- 16 Beard DJ, Kyberd PJ, Fergusson CM, et al. Proprioception after rupture of the anterior cruciate ligament. An objective indication of the need for surgery? *J Bone Joint Surg Br* 1993;75(2):311–15.
- 17 Blackburn JT, Norcross MF, Padua DA. Influences of hamstring stiffness and strength on anterior knee joint stability. *Clin Biomech (Bristol, Avon)* 2011;26(3):278–83.
- 18 Solomonow M, Baratta R, Zhou BH, et al. The synergistic action of the anterior cruciate ligament and thigh muscles in maintaining joint stability. *Am J Sports Med* 1987;15(3):207–13.
- 19 Kapreli E, Athanasopoulos S. The anterior cruciate ligament deficiency as a model of brain plasticity. *Med. Hypotheses* 2006;67(3):645–50.
- 20 Ward S, Pearce AJ, Pietrosimone B, et al. Neuromuscular deficits after peripheral joint injury: A neurophysiological hypothesis. *Muscle & nerve* 2015;51(3):327–32.
- 21 Needle AR, Lepley AS, Grooms DR. Central Nervous System Adaptation After Ligamentous Injury: A Summary of Theories, Evidence, and Clinical Interpretation. *Sports Med* 2017;47(7):1271–88.

- 1  
2  
3 22 Baumeister J, Reinecke K, Schubert M, et al. Altered electrocortical brain activity after ACL reconstruction during force control. *J. Orthop. Res.* 2011;29(9):1383–89.
- 4 23 Baumeister J, Reinecke K, Weiss M. Changed cortical activity after anterior cruciate ligament reconstruction in a joint position paradigm: an EEG study. *Scand J Med Sci Sports* 2008;18(4):473–84.
- 5  
6 24 Grooms DR, Page SJ, Onate JA. Brain Activation for Knee Movement Measured Days Before Second Anterior Cruciate Ligament Injury: Neuroimaging in Musculoskeletal Medicine. *J Athl Train* 2015;50(10):1005–10.
- 7  
8 25 Kapreli E, Athanasopoulos S, Gliatis J, et al. Anterior cruciate ligament deficiency causes brain plasticity: A functional MRI study. *Am J Sports Med* 2009;37(12):2419–26.
- 9  
10 26 Ball T, Schreiber A, Feige B, et al. The role of higher-order motor areas in voluntary movement as revealed by high-resolution EEG and fMRI. *Neuroimage* 1999;10(6):682–94.
- 11  
12 27 Geisler PR, Needle AR, Rosen AB. Ligament Injury Changes Brain Function: Now Let's Think About It. *Athletic Training & Sports Health Care* 2017;9(5):198–99.
- 13  
14 28 Grooms DR, Onate JA. Neuroscience Application to Noncontact Anterior Cruciate Ligament Injury Prevention. *Sports Health* 2015.
- 15  
16 29 Swanik CB. Brains and Sprains: The Brain's Role in Noncontact Anterior Cruciate Ligament Injuries. *J Athl Train* 2015;50(10):1100–02.
- 17  
18 30 C Herman D, Zaremski JL, Vincent HK, et al. Effect of neurocognition and concussion on musculoskeletal injury risk. *Curr Sports Med Rep* 2015;14(3):194–99.
- 19  
20 31 Boden BP, Dean GS, Feagin JA, et al. Mechanisms of anterior cruciate ligament injury. *Orthopedics* 2000;23(6):573–78.
- 21  
22 32 Krupenevich RL, Pruziner AL, Miller RH. Knee Joint Loading during Single-Leg Forward Hopping. *Medicine and science in sports and exercise* 2017;49(2):327–32.
- 23  
24 33 Brown TN, Palmieri-Smith RM, McLean SG. Sex and limb differences in hip and knee kinematics and kinetics during anticipated and unanticipated jump landings: implications for anterior cruciate ligament injury. *Br J Sports Med* 2009;43(13):1049–56.
- 25  
26 34 McLean SG, Samorezov JE. Fatigue-induced ACL injury risk stems from a degradation in central control. *Medicine and science in sports and exercise* 2009;41(8):1661–72.
- 27  
28 35 Hallett M. Movement-related cortical potentials. *Electromyogr Clin Neurophysiol* 1994;34(1):5–13.
- 29  
30 36 Shibasaki H, Barrett G, Halliday E, et al. Components of the movement-related cortical potential and their scalp topography. *Electroencephalogr Clin Neurophysiol* 1980;49(3-4):213–26.
- 31  
32 37 Shibasaki H, Hallett M. What is the Bereitschaftspotential? *Clin Neurophysiol* 2006;117(11):2341–56.
- 33  
34 38 Kornhuber HH, Deecke L. HIRNPOTENTIALAENDERUNGEN BEI WILLKUEBERWEGUNGEN UND PASSIVEN BEWEGUNGEN DES MENSCHEN: BEREITSCHAFTSPOTENTIAL UND REAFFERENTE POTENTIALE. *Pflugers Arch Gesamte Physiol Menschen Tiere* 1965;284:1–17.
- 35  
36 39 Deecke L, Scheid P, KORNHUBER HH. Distribution of readiness potential, pre-motion positivity, and motor potential of the human cerebral cortex preceding voluntary finger movements. *Experimental brain research* 1969;7(2):158–68.
- 37  
38 40 Deecke L. Bereitschaftspotential as an indicator of movement preparation in supplementary motor area and motor cortex. *Ciba Found Symp* 1987;132:231–50.
- 39  
40 41 Spring JN, Place N, Borrani F, et al. Movement-Related Cortical Potential Amplitude Reduction after Cycling Exercise Relates to the Extent of Neuromuscular Fatigue. *Front Hum Neurosci* 2016;10:257.
- 41  
42 42 Wright DJ, Holmes PS, Di Russo F, et al. Differences in cortical activity related to motor planning between experienced guitarists and non-musicians during guitar playing. *Hum Mov Sci* 2012;31(3):567–77.
- 43  
44 43 Falvo M. Neurophysiological Adaptations to Resistance Training and Repetitive Grasping. Washington University in St. Louis. All Theses and Dissertations (ETDs). 2010;104.
- 45  
46 44 Doppelmayr M, Finkenzyler T, Sauseng P. Frontal midline theta in the pre-shot phase of rifle shooting: differences between experts and novices. *Neuropsychologia* 2008;46(5):1463–67.
- 47  
48 45 Gevins A. High-resolution EEG mapping of cortical activation related to working memory: Effects of task difficulty, type of processing, and practice. *Cerebral Cortex* 1997;7(4):374–85.
- 49  
50  
51  
52  
53  
54  
55  
56  
57  
58  
59

- 1  
2  
3 46 Sauseng P, Klimesch W, Schabus M, et al. Fronto-parietal EEG coherence in theta and upper  
4 alpha reflect central executive functions of working memory. *Int J Psychophysiol*  
5 2005;57(2):97–103.
- 6 47 Pfurtscheller G, Lopes da Silva FH. Event-related EEG/MEG synchronization and  
7 desynchronization: Basic principles. *Clin Neurophysiol* 1999;110(11):1842–57.
- 8 48 Pfurtscheller G, Andrew C. Event-Related changes of band power and coherence: Methodology  
9 and interpretation. *J Clin Neurophysiol* 1999;16(6):512–19.
- 10 49 Cheng M-Y, Hung C-L, Huang C-J, et al. Expert-novice differences in SMR activity during dart  
11 throwing. *Biol Psychol* 2015;110:212–18.
- 12 50 Babiloni C, Carducci F, Cincotti F, et al. Human movement-related potentials vs  
13 desynchronization of EEG alpha rhythm: A high-resolution EEG study. *Neuroimage*  
14 1999;10(6):658–65.
- 15 51 Kaiser J, Birbaumer N, Lutzenberger W. Event-related beta desynchronization indicates timing  
16 of response selection in a delayed-response paradigm in humans. *Neuroscience Letters*  
17 2001;312(3):149–52.
- 18 52 Deiber M-P, Sallard E, Ludwig C, et al. EEG alpha activity reflects motor preparation rather  
19 than the mode of action selection. *Front Integr Neurosci* 2012;6:59.
- 20 53 Tzagarakis C, Ince NF, Leuthold AC, et al. Beta-band activity during motor planning reflects  
21 response uncertainty. *J Neurosci* 2010;30(34):11270–77.
- 22 54 Zaepffel M, Trachel R, Kilavik BE, et al. Modulations of EEG beta power during planning and  
23 execution of grasping movements. *PLoS one* 2013;8(3):e60060.
- 24 55 Gudmundsson S, Runarsson TP, Sigurdsson S, et al. Reliability of quantitative EEG features.  
25 *Clin Neurophysiol* 2007;118(10):2162–71.
- 26 56 Baumeister J, Reinecke K, Schubert M, et al. Effects of induced fatigue on brain activity during  
27 sensorimotor control. *Eur J Appl Physiol* 2012;112(7):2475–82.
- 28 57 Silva F, Arias-Carrión O, Teixeira S, et al. Functional coupling of sensorimotor and associative  
29 areas during a catching ball task: A qEEG coherence study. *Int Arch Med* 2012;5:9.
- 30 58 Roberts A, Fillmore P, Decker S. Clinical Applicability of the Test-retest Reliability of qEEG  
31 Coherence. *NR* 2016;3(1):7–22.
- 32 59 Colby SM, Hintermeister RA, Torry MR, et al. Lower limb stability with ACL impairment. *The*  
33 *Journal of orthopaedic and sports physical therapy* 1999;29(8):444-51; discussion 452-4.
- 34 60 Wikstrom EA, Tillman MD, Smith AN, et al. A new force-plate technology measure of dynamic  
35 postural stability: the dynamic postural stability index. *J Athl Train* 2005;40(4):305–09.
- 36 61 Jensen RL. Reliability of time to stabilization in single leg standing. In Proceedings of the  
37 XXVII Conference of the International Society of Biomechanics in Sports (Harrison, AJ,  
38 Anderson, R, Kenny, I, editors) 2009;346-349.
- 39 62 Palmieri RM, Ingersoll CD, Stone MB, et al. Center-of-Pressure Parameters Used in the  
40 Assessment of Postural Control. *Journal of sport rehabilitation* 2002;11(1):51–66.
- 41 63 Fransz DP, Huurnink A, Boode VA de, et al. Time series of ground reaction forces following a  
42 single leg drop jump landing in elite youth soccer players consist of four distinct phases. *Gait*  
43 *Posture* 2016;50:137–44.
- 44 64 Li Z, Liang Y-Y, Wang L, et al. Reliability and validity of center of pressure measures for  
45 balance assessment in older adults. *J Phys Ther Sci* 2016;28(4):1364–67.
- 46 65 Logerstedt D, Grindem H, Lynch A, et al. Single-legged hop tests as predictors of self-reported  
47 knee function after anterior cruciate ligament reconstruction: The Delaware-Oslo ACL cohort  
48 study. *Am J Sports Med* 2012;40(10):2348–56.
- 49 66 O'Connor ML. The Development of the Single-Leg Landing Error Scoring System (SL-LESS)  
50 for Lower Extremity Movement Screening: Theses and Dissertations 2015.
- 51 67 Lysholm J, Gillquist J. Evaluation of knee ligament surgery results with special emphasis on use  
52 of a scoring scale. *Am J Sports Med* 1982;10(3):150–54.
- 53 68 Rusu AC, Kreddig N, Hallner D, et al. Fear of movement/(Re)injury in low back pain:  
54 Confirmatory validation of a German version of the Tampa Scale for Kinesiophobia. *BMC*  
55 *Musculoskelet Disord* 2014;15:280.
- 56 69 Tombaugh T. Trail Making Test A and B: Normative data stratified by age and education. *Arch*  
57 *Clin Neuropsychol* 2004;19(2):203–14.
- 58  
59  
60

- 1  
2  
3 70 Maruff P, Thomas E, Cysique L, et al. Validity of the CogState brief battery: Relationship to  
4 standardized tests and sensitivity to cognitive impairment in mild traumatic brain injury,  
5 schizophrenia, and AIDS dementia complex. *Archives of clinical neuropsychology the official*  
6 *journal of the National Academy of Neuropsychologists* 2009;24(2):165–78.
- 7 71 Woods DL, Kishiyama MM, Lund EW, et al. Improving digit span assessment of short-term  
8 verbal memory. *J Clin Exp Neuropsychol* 2011;33(1):101–11.
- 9 72 Pietrzak RH, Maruff P, Mayes LC, et al. An examination of the construct validity and factor  
10 structure of the Groton Maze Learning Test, a new measure of spatial working memory, learning  
11 efficiency, and error monitoring. *Arch Clin Neuropsychol* 2008;23(4):433–45.
- 12 73 Verbruggen F, Logan GD. Response inhibition in the stop-signal paradigm. *Trends Cogn Sci*  
13 *(Regul Ed)* 2008;12(11):418–24.
- 14 74 van der Elst W, van Boxtel MPJ, van Breukelen GJP, et al. The Stroop color-word test:  
15 Influence of age, sex, and education; and normative data for a large sample across the adult age  
16 range. *Assessment* 2006;13(1):62–79.
- 17 75 Winkler I, Debener S, Müller K-R, et al. On the influence of high-pass filtering on ICA-based  
18 artifact reduction in EEG-ERP. *Conf Proc IEEE Eng Med Biol Soc* 2015;2015:4101–05.
- 19 76 Luchsinger H, Sandbakk Ø, Schubert M, et al. A Comparison of Frontal Theta Activity During  
20 Shooting among Biathletes and Cross-Country Skiers before and after Vigorous Exercise. *PloS*  
21 *one* 2016;11(3):e0150461.
- 22 77 Bastos AM, Schoffelen J-M. A Tutorial Review of Functional Connectivity Analysis Methods  
23 and Their Interpretational Pitfalls. *Front Syst Neurosci* 2015;9:175.
- 24 78 Huijgen BC, Leemhuis S, Kok NM, et al. Cognitive Functions in Elite and Sub-Elite Youth  
25 Soccer Players Aged 13 to 17 Years. *PloS one* 2015;10(12):e0144580.
- 26 79 Verburgh L, Scherder EJ, van Lange PA, et al. Executive functioning in highly talented soccer  
27 players. *PloS one* 2014;9(3):e91254.
- 28 80 Herman DC, Barth JT. Drop-Jump Landing Varies With Baseline Neurocognition: Implications  
29 for Anterior Cruciate Ligament Injury Risk and Prevention. *Am J Sports Med* 2016;44(9):2347–  
30 53.
- 31 81 Swanik CB, Covassin T, Stearne DJ, et al. The relationship between neurocognitive function and  
32 noncontact anterior cruciate ligament injuries. *Am J Sports Med* 2007;35(6):943–48.
- 33 82 Hutchison M, Comper P, Mainwaring L, et al. The influence of musculoskeletal injury on  
34 cognition: implications for concussion research. *Am J Sports Med* 2011;39(11):2331–37.
- 35 83 Mokha M, Wilkerson GB. Neurocognitive Reaction Time Predicts Lower Extremity Sprains and  
36 Strains. *International Journal of Athletic Therapy and Training* 2012;17(6):4–9.
- 37 84 Mang CS, Clair JM, Collins DF. Neuromuscular electrical stimulation has a global effect on  
38 corticospinal excitability for leg muscles and a focused effect for hand muscles. *Experimental*  
39 *brain research* 2011;209(3):355–63.
- 40 85 Hart JM, Kuenze CM, Pietrosimone BG, et al. Quadriceps function in anterior cruciate ligament-  
41 deficient knees exercising with transcutaneous electrical nerve stimulation and cryotherapy: A  
42 randomized controlled study. *Clin Rehabil* 2012;26(11):974–81.
- 43 86 Pietrosimone B, McLeod MM, Florea D, et al. Immediate increases in quadriceps corticomotor  
44 excitability during an electromyography biofeedback intervention. *J Electromyogr Kinesiol*  
45 2015;25(2):316–22.
- 46 87 Gibbons CE, Pietrosimone BG, Hart JM, et al. Transcranial magnetic stimulation and volitional  
47 quadriceps activation. *J Athl Train* 2010;45(6):570–79.
- 48  
49  
50  
51  
52  
53  
54  
55  
56  
57  
58  
59  
60

## Figure captions

**Figure 1:** Experimental study setup. The figure details the days in which participants are assessed.

**Figure 2:** Setup of the Jump-Landing Experiment.

*Rubber mat (1); Hinge (2); Plastic panel (3); USB-button switch (4); Force plate (5); USB-cable connecting button switch with screen (PowerPoint; 6); Laptop with screen (17 Inch diameter; 7); Powerpoint-slides demonstrated on laptop screen indicating left or right foot landing (randomised order). Before each foot slide a separate slide containing a fixation cross is demonstrated (8).*

**Figure 3:** Proceedings of anticipated jump-landings and the clarification when and how the visual stimulus indicating the side on which the single leg-landing has to be performed is presented.

*A = slide with a fixation cross; B = slide is presented before the initiation of the jump. Participants start standing in bipedal position on the plastic panel (3; Figure 2) while fixating the cross (A). The experimenter indicates the start of movement preparation by mentioning the condition “anticipated”. Simultaneously the slide demonstrating the landing leg (B) is shown. Afterwards, participants initiate the jump by their own.*

**Figure 4:** Proceedings of non-anticipated jump-landings and the clarification when and how the visual stimulus indicating the side on which the single leg-landing has to be performed is presented.

*C = slide with a fixation cross (same as in A; Fig 3); D = USB-button (4, Figure 2) release during take-off (plastic panel elevates) initiating slide change; E = slide indicating the landing foot presented only after take-off. Participants start standing in bipedal position on the plastic panel (3; Figure 2) while fixating the cross (C). The experimenter mentions the jump-landing condition “non-anticipated”. Afterwards, participants will initiate the jump by their own while C is still shown. The slide indicating the landing leg (E) appears about 120 milliseconds after take-off (button release; D) and is then shown continuously (for more details, refer to the supplementary video file).*

### Supplementary video file

This video demonstrates in exemplary the non-anticipated jump-landing task according to the description provided in Figure 4.

**Trial status**

At the time of submission of this manuscript, recruitment is ongoing.

**Abbreviations**

ACL: Anterior cruciate ligament; COP: Center of Pressure; CNS: Central nervous system; EEG: Electroencephalography; GRF: Vertical peak ground reaction force; MRCP: Movement-related cortical potentials; TTS: Time to stabilisation; VAS: Visual analogue scale

**Funding**

No external funding.

**Conflict of interests**

The authors have nothing to disclose.

**Competing interests**

All authors have completed the ICMJE uniform disclosure form at [www.icmje.org/coi\\_disclosure.pdf](http://www.icmje.org/coi_disclosure.pdf) and declare: no support from any organisation for the submitted work; no financial relationships with any organisations that might have an interest in the submitted work in the previous three years; no other relationships or activities that could appear to have influenced the submitted work. We declare that we have no competing interests.

**Data statement**

After completion of data acquisition the dataset will be available from ResearchGate.

**Author Statement**

FG developed the jump-landing setup and selected the neurophysiological and biomechanical outcome measures. FG wrote the first draft of the manuscript, revised the manuscript and provided final approval. TE assisted FG in the development of the trial jump-landing setup and in the selection of biomechanical outcome parameters. TE revised the manuscript, provided critical review and final approval. JW assisted FG in the development of the trial jump-landing setup and in the selection of biomechanical outcome parameters. JW revised the manuscript, provided critical review and final approval. DN revised the manuscript, provided critical review and final approval. JW assisted FG in the development of the trial jump-landing setup and in the selection of biomechanical outcome parameters. DN revised the manuscript, provided critical review and final approval. LV revised the manuscript and provided intellectual contributions to the final, submitted version of the manuscript. WB revised the manuscript and provided intellectual contributions to the final, submitted version of the manuscript. The material within has not been and will not be submitted for publication elsewhere except as an abstract. The authors agree that the copyright for our article is transferred to the publisher if and when the article is accepted for publication.

### **Acknowledgements**

We especially recognize the assistance of Dr. Solveig Vieluf (Sports Medicine department, University of Paderborn, Germany) in the development of the EEG setup. Furthermore, we like to thank Alwin Eifler for providing written consent for publication of his individual details and the accompanying video of this manuscript.

### **Consent for publication**

Written informed consent was obtained from the participants for publication of their individual details and accompanying images/ video in this manuscript. The consent form is held by the authors and is available for review by the Editor-in-Chief.

### **Ethics approval and consent to participate**

The study was approved by the local Ethics Committee of the Faculty of Psychology and Sport Science, Goethe-University Frankfurt (reference number: 2017/27). The trial will be carried out according to the Guidelines for Good Clinical Practice and according to the Declaration of Helsinki, including its modification of Fortaleza. All participants provide informed consent prior to study enrollment.

### **Trial registration**

The study has been registered at [clinicaltrials.gov](http://clinicaltrials.gov) (NCT03336060).



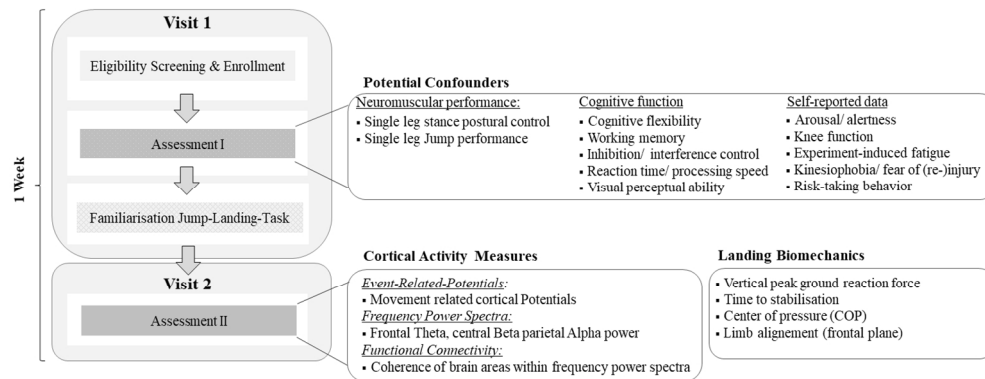

20 Experimental study setup. The figure details the days in which participants are assessed.

21  
22 410x160mm (96 x 96 DPI)

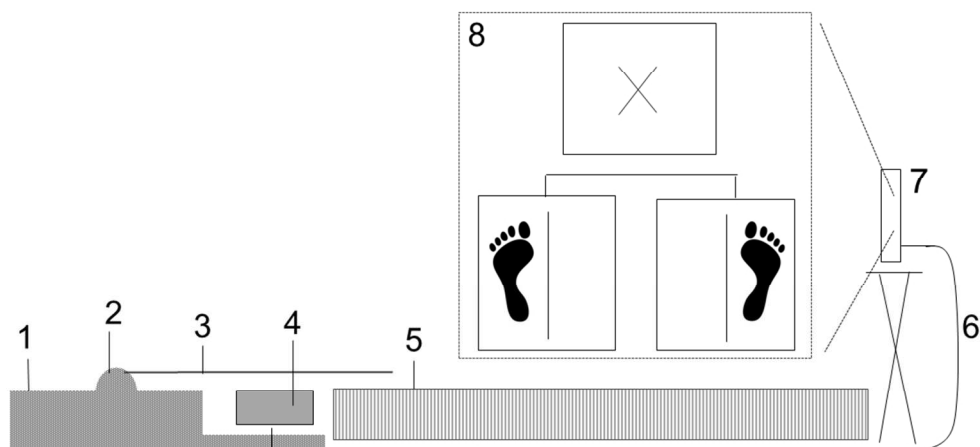

Setup of the Jump-Landing Experiment.

300x160mm (96 x 96 DPI)

1  
2  
3  
4  
5  
6  
7  
8  
9  
10  
11  
12  
13  
14  
15  
16  
17  
18  
19  
20  
21  
22  
23  
24  
25  
26  
27  
28  
29  
30  
31  
32  
33  
34  
35  
36  
37  
38  
39  
40  
41  
42  
43  
44  
45  
46  
47  
48  
49  
50  
51  
52  
53  
54  
55  
56  
57  
58  
59  
60

## Anticipated

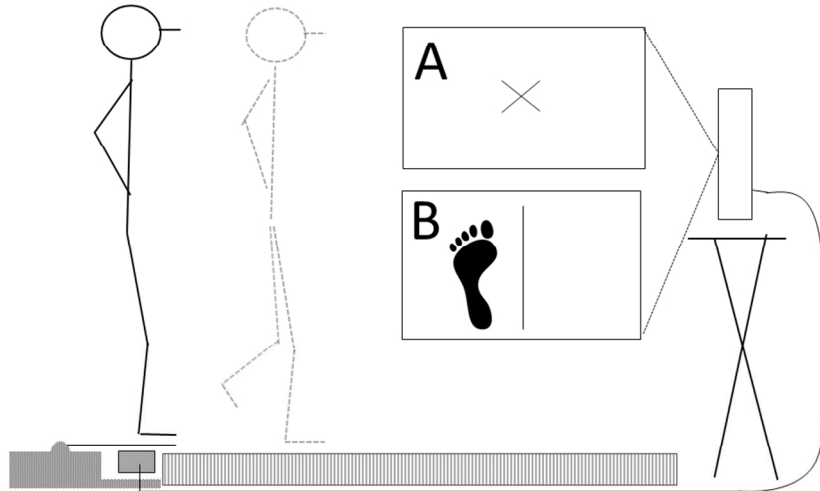

Proceedings of anticipated jump-landings and the clarification when and how the visual stimulus indicating the side on which the single leg-landing has to be performed is presented.

300x210mm (96 x 96 DPI)

Peer Review Only

## Non-anticipated

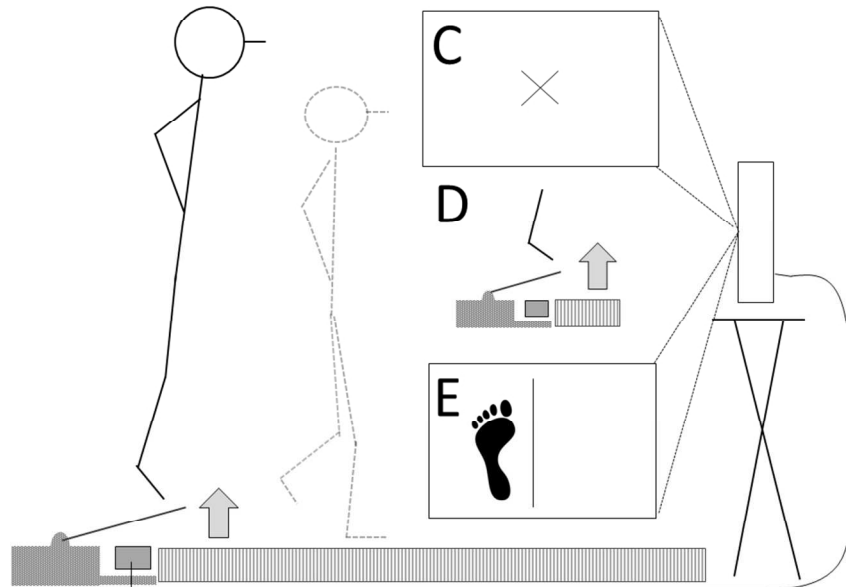

Proceedings of non-anticipated jump-landings and the clarification when and how the visual stimulus indicating the side on which the single leg-landing has to be performed is presented.

300x210mm (96 x 96 DPI)

**STROBE 2007 (v4) Statement—Checklist of items that should be included in reports of *case-control studies***

| Section/Topic                | Item # | Recommendation                                                                                                                                                                       | Reported on page #    |
|------------------------------|--------|--------------------------------------------------------------------------------------------------------------------------------------------------------------------------------------|-----------------------|
| Title and abstract           | 1      | (a) Indicate the study's design with a commonly used term in the title or the abstract                                                                                               | 1, 2                  |
|                              |        | (b) Provide in the abstract an informative and balanced summary of what was done and what was found                                                                                  | 2                     |
| <b>Introduction</b>          |        |                                                                                                                                                                                      |                       |
| Background/rationale         | 2      | Explain the scientific background and rationale for the investigation being reported                                                                                                 | 3                     |
| Objectives                   | 3      | State specific objectives, including any prespecified hypotheses                                                                                                                     | 5                     |
| <b>Methods</b>               |        |                                                                                                                                                                                      |                       |
| Study design                 | 4      | Present key elements of study design early in the paper                                                                                                                              | 5                     |
| Setting                      | 5      | Describe the setting, locations, and relevant dates, including periods of recruitment, exposure, follow-up, and data collection                                                      | 5                     |
| Participants                 | 6      | (a) Give the eligibility criteria, and the sources and methods of case ascertainment and control selection. Give the rationale for the choice of cases and controls                  | 6,7                   |
|                              |        | (b) For matched studies, give matching criteria and the number of controls per case                                                                                                  | n.a.                  |
| Variables                    | 7      | Clearly define all outcomes, exposures, predictors, potential confounders, and effect modifiers. Give diagnostic criteria, if applicable                                             | 7 f.                  |
| Data sources/<br>measurement | 8*     | For each variable of interest, give sources of data and details of methods of assessment (measurement). Describe comparability of assessment methods if there is more than one group | 7 f.                  |
| Bias                         | 9      | Describe any efforts to address potential sources of bias                                                                                                                            | n.a.                  |
| Study size                   | 10     | Explain how the study size was arrived at                                                                                                                                            |                       |
| Quantitative variables       | 11     | Explain how quantitative variables were handled in the analyses. If applicable, describe which groupings were chosen and why                                                         | 12, 13                |
| Statistical methods          | 12     | (a) Describe all statistical methods, including those used to control for confounding                                                                                                | 13                    |
|                              |        | (b) Describe any methods used to examine subgroups and interactions                                                                                                                  | 13                    |
|                              |        | (c) Explain how missing data were addressed                                                                                                                                          | n.a.                  |
|                              |        | (d) If applicable, explain how matching of cases and controls was addressed                                                                                                          | n.a.                  |
|                              |        | (e) Describe any sensitivity analyses                                                                                                                                                | n.a.                  |
| <b>Results</b>               |        |                                                                                                                                                                                      | n.a. (study protocol) |

|                          |     |                                                                                                                                                                                                              |                       |
|--------------------------|-----|--------------------------------------------------------------------------------------------------------------------------------------------------------------------------------------------------------------|-----------------------|
| Participants             | 13* | (a) Report numbers of individuals at each stage of study—eg numbers potentially eligible, examined for eligibility, confirmed eligible, included in the study, completing follow-up, and analysed            | “                     |
|                          |     | (b) Give reasons for non-participation at each stage                                                                                                                                                         | “                     |
|                          |     | (c) Consider use of a flow diagram                                                                                                                                                                           | “                     |
| Descriptive data         | 14* | (a) Give characteristics of study participants (eg demographic, clinical, social) and information on exposures and potential confounders                                                                     | “                     |
|                          |     | (b) Indicate number of participants with missing data for each variable of interest                                                                                                                          | “                     |
| Outcome data             | 15* | Report numbers in each exposure category, or summary measures of exposure                                                                                                                                    | “                     |
| Main results             | 16  | (a) Give unadjusted estimates and, if applicable, confounder-adjusted estimates and their precision (eg, 95% confidence interval). Make clear which confounders were adjusted for and why they were included | “                     |
|                          |     | (b) Report category boundaries when continuous variables were categorized                                                                                                                                    | “                     |
|                          |     | (c) If relevant, consider translating estimates of relative risk into absolute risk for a meaningful time period                                                                                             | “                     |
| Other analyses           | 17  | Report other analyses done—eg analyses of subgroups and interactions, and sensitivity analyses                                                                                                               | “                     |
| <b>Discussion</b>        |     |                                                                                                                                                                                                              | 13, 14                |
| Key results              | 18  | Summarise key results with reference to study objectives                                                                                                                                                     | n.a. (study protocol) |
| Limitations              | 19  | Discuss limitations of the study, taking into account sources of potential bias or imprecision.<br>Discuss both direction and magnitude of any potential bias                                                | “                     |
| Interpretation           | 20  | Give a cautious overall interpretation of results considering objectives, limitations, multiplicity of analyses, results from similar studies, and other relevant evidence                                   | “                     |
| Generalisability         | 21  | Discuss the generalisability (external validity) of the study results                                                                                                                                        | “                     |
| <b>Other information</b> |     |                                                                                                                                                                                                              |                       |
| Funding                  | 22  | Give the source of funding and the role of the funders for the present study and, if applicable, for the original study on which the present article is based                                                | 13                    |

\*Give information separately for cases and controls in case-control studies and, if applicable, for exposed and unexposed groups in cohort and cross-sectional studies.

**Note:** An Explanation and Elaboration article discusses each checklist item and gives methodological background and published examples of transparent reporting. The STROBE checklist is best used in conjunction with this article (freely available on the Web sites of PLoS Medicine at <http://www.plosmedicine.org/>, Annals of Internal Medicine at <http://www.annals.org/>, and Epidemiology at <http://www.epidem.com/>). Information on the STROBE Initiative is available at [www.strobe-statement.org](http://www.strobe-statement.org).

# BMJ Open

## Neurophysiological correlates of motor planning and movement initiation in ACL-reconstructed individuals: A case-control study

|                                                                                                                                                                                                                |                                                                                                                                                                                                                                                                                                                                                                                                                                                                                                                |
|----------------------------------------------------------------------------------------------------------------------------------------------------------------------------------------------------------------|----------------------------------------------------------------------------------------------------------------------------------------------------------------------------------------------------------------------------------------------------------------------------------------------------------------------------------------------------------------------------------------------------------------------------------------------------------------------------------------------------------------|
| Journal:                                                                                                                                                                                                       | <i>BMJ Open</i>                                                                                                                                                                                                                                                                                                                                                                                                                                                                                                |
| Manuscript ID                                                                                                                                                                                                  | bmjopen-2018-023048.R1                                                                                                                                                                                                                                                                                                                                                                                                                                                                                         |
| Article Type:                                                                                                                                                                                                  | Protocol                                                                                                                                                                                                                                                                                                                                                                                                                                                                                                       |
| Date Submitted by the Author:                                                                                                                                                                                  | 23-Jul-2018                                                                                                                                                                                                                                                                                                                                                                                                                                                                                                    |
| Complete List of Authors:                                                                                                                                                                                      | Giesche, Florian; Goethe University Frankfurt/Main, Department of Sports Medicine<br>Engeroff, Tobias; Goethe University Frankfurt/Main, Department of Sports Medicine<br>Wilke, Jan; Goethe University Frankfurt/Main, Department of Sports Medicine<br>Niederer, Daniel; Goethe University Frankfurt/Main, Department of Sports Medicine<br>Vogt, Lutz; Goethe University Frankfurt/Main, Department of Sports Medicine<br>Banzer, Winfried; Goethe University Frankfurt/Main, Department of Sports Medicine |
| <b>Primary Subject Heading</b>:                                                                                                                                                                                | Sports and exercise medicine                                                                                                                                                                                                                                                                                                                                                                                                                                                                                   |
| Secondary Subject Heading:                                                                                                                                                                                     | Rehabilitation medicine, Sports and exercise medicine                                                                                                                                                                                                                                                                                                                                                                                                                                                          |
| Keywords:                                                                                                                                                                                                      | ACL rupture, neuromuscular function, cortical activity, neurocognition, neuroplasticity, central nervous system modifications                                                                                                                                                                                                                                                                                                                                                                                  |
| <p>Note: The following files were submitted by the author for peer review, but cannot be converted to PDF. You must view these files (e.g. movies) online.</p> <p>Supplementary file - video 0.5 speed.mp4</p> |                                                                                                                                                                                                                                                                                                                                                                                                                                                                                                                |

SCHOLARONE™  
Manuscripts

1  
2  
3 1 *Neurophysiological correlates of motor planning and movement*  
4  
5 2 *initiation in ACL-reconstructed individuals: A case-control study*  
6

7 3

8  
9  
10 4 Florian Giesche, Tobias Engeroff, Jan Wilke, Daniel Niederer, Lutz Vogt, Winfried Banzer

11  
12 5 Department of Sports Medicine, Goethe University Frankfurt, Frankfurt/ Main, Germany  
13

14 6

15  
16 7 Corresponding author:

17  
18 8 Florian Giesche

19  
20 9 Department of Sports Medicine, Goethe University Frankfurt,

21  
22 10 Ginnheimer Landstraße 39; 60487 Frankfurt/ Main, Germany  
23

24 11 T: +49 (0)69 798 244 82

25  
26 12 F: +49 (0)69 798 24592

27  
28 13 E-Mail: [giesche@sport.uni-frankfurt.de](mailto:giesche@sport.uni-frankfurt.de)  
29

30 14

31 15

32  
33 16 Word count: 7.591  
34  
35  
36  
37  
38  
39  
40  
41  
42  
43  
44  
45  
46  
47  
48  
49  
50  
51  
52  
53  
54  
55  
56  
57  
58  
59  
60



## 17 **Abstract**

18  
19 **INTRODUCTION:** Current evidence suggests that the loss of mechanoreceptors after anterior  
20 cruciate ligament (ACL) tears might be compensated by increased cortical motor planning. This  
21 occupation of cerebral resources may limit the potential to quickly adapt movements to unforeseen  
22 external stimuli in the athletic environment. To date, studies investigating such neural alterations  
23 during movement focused on simple, anticipated tasks with poor ecological validity. This trial,  
24 therefore, aims to investigate the cortical and biomechanical processes associated with more sport- and  
25 injury-related movements in ACL-reconstructed individuals.

26 **METHODS AND ANALYSIS:** ACL-reconstructed participants and uninjured controls will perform  
27 repetitive counter-movement jumps with single-leg landings. Two different conditions are to be  
28 completed: anticipated (n = 35) vs. unanticipated (n = 35) successful landings. Under the anticipated  
29 condition, participants receive the visual information depicting the requested landing leg prior to the  
30 jump. In the unanticipated condition, this information will be provided about ms prior to landing.  
31 Neural correlates of motor planning will be measured using electroencephalography. In detail,  
32 movement-related cortical potentials, frequency spectral power, and functional connectivity will be  
33 assessed. Biomechanical landing quality will be captured via a capacitive force plate. Calculated  
34 parameters encompass time to stabilization, vertical peak ground reaction force and center of pressure  
35 path length. Potential systematic differences between ACL-reconstructed individuals and controls will  
36 be identified in dependence of jumping condition (anticipated, unanticipated, left and right landing leg  
37 and rest) by using interference statistics. Potential associations between the cortical and biomechanical  
38 measures will be calculated by means of correlation analysis. In case of statistical significance ( $\alpha <$   
39 .05.) further confounders (cofactors) will be considered.

40 **ETHICS AND DISSEMINATION:** The independent Ethics Committee of the University of  
41 Frankfurt (Faculty of Psychology and Sport Sciences) approved the study. Publications in peer-  
42 reviewed journals are planned. The findings will be presented at scientific conferences.

43 **PROTOCOL REGISTRATION NUMBER:** NCT03336060 (ClinicalTrials.gov)

44 **Keywords:** ACL rupture, neuromuscular function, cortical activity, neurocognition, neuroplasticity,  
45 central nervous system modifications

## 46 Article Summary

### 47 Strengths and limitations of this study

- 48 • First-time investigation of the link between electrocortical (EEG) activity (neural correlates of  
49 motor planning) and biomechanical function during typical sport- and injury-related movements  
50 (single-leg landings) in ACL-reconstructed individuals.
- 51 • Association between increased use of motor planning capacities and lower postural control during  
52 landing in ACL-reconstructed individuals may have major implications for rehabilitation and  
53 return to sports.
- 54 • Comparison against both, unaffected leg of the ACL-reconstructed individuals as well as  
55 uninjured controls and rigorous control of relevant confounders (i.e. cognitive functions).
- 56 • Investigator and participant blinding is not possible.

## 58 1. Introduction

59 Anterior cruciate ligament (ACL) tears of the knee represent one of the most common sports-related  
60 injuries, particularly among young, physically active individuals[1, 2]. The disorder represents the  
61 leading cause of sports-related surgery[3] and, besides the severe acute and long-term consequences  
62 (e.g. pain, functional disability and impairments;[4]), is associated with a higher lifetime risk of knee  
63 osteoarthritis[5]. Despite several multidisciplinary therapeutic approaches aiming to restore preinjury  
64 neuromuscular function, the odds of sustaining a second tear are significantly increased in afflicted  
65 individuals who returned to sports[6, 7]. It may, therefore, be inferred that current rehabilitation  
66 paradigms fail to eliminate all impairments of the injury[8, 9].

67 Besides affecting mechanical stability, ACL rupture is associated with substantial destructions of  
68 ligament mechanoreceptors[10]. Under healthy conditions, the sensory receptors located in the ACL,  
69 e.g. Ruffini and Pacini corpuscles, provide essential proprioceptive information[11–13] and regulate  
70 the activity of the Hamstring muscles[14–16]. Representing a synergist of the ACL, the Hamstrings  
71 are paramount for functional stability of the knee joint[17, 18]. As the neural drive to the muscle  
72 depends on the sensory input, the above described peripheral deafferentation (mechanoreceptor

1  
2  
3 73 damage), secondary to the rather acute consequences of the injury (e.g. pain, swelling and  
4  
5 74 inflammation), could induce neuroplastic changes in the brain[19, 20].  
6

7  
8 75 Current evidence demonstrates persistent central nervous system (CNS) adaptations occurring after  
9  
10 76 ligamentous injuries and subsequent reconstruction surgeries[21]. Electroencephalographic (EEG)  
11  
12 77 studies revealed increased activity of the frontal [22] and frontoparietal cortex[23] during the  
13  
14 78 execution of sensorimotor tasks in ACL-reconstructed compared to unimpaired controls. It has been  
15  
16 79 suggested that this may be related to an increased attentional control and somatosensory information  
17  
18 80 processing related to a higher working memory load[22, 23]. Similarly, neuroimaging studies showed  
19  
20 81 ACL-injured individuals to exhibit a higher recruitment of cortical areas responsible for motor  
21  
22 82 planning, sensory processing and visual-motor control during the execution of repetitive knee  
23  
24 83 extensions[24, 25]. It may be concluded that the brain of ACL-injured and -reconstructed individuals  
25  
26 84 relies more on higher-order motor control areas [26] and executive function even during simple,  
27  
28 85 feedback-controlled movements, such as joint repositioning[23], force matching tasks[22] and knee  
29  
30 86 extensions[8, 25] in order to compensate for the reduced sensory input[21, 25, 27].  
31

32  
33 87 While the consequences of this supraspinal compensation strategy may be invisible during activities of  
34  
35 88 daily living, they may place an athlete at risk of injury during sports and competition. To maintain  
36  
37 89 neuromuscular control in a complex and dynamic athletic environment, a constant interaction between  
38  
39 90 intrinsic (e.g. motor planning, joint position and movement) and extrinsic factors (e.g. other players,  
40  
41 91 ball and unanticipated stimuli) is required, based on the simultaneous integration and processing of  
42  
43 92 varying proprioceptive, visual and vestibular information[8, 28–30]. In most situations leading to an  
44  
45 93 injury, athletes, under high time constraints, are required to quickly adapt to the changing environment  
46  
47 94 and cannot rely on pre-planned, anticipated movements exclusively[28, 29]. Against this background,  
48  
49 95 current evidence suggests that rapid movement adaptations such as single-leg landings and cuttings in  
50  
51 96 response to an unanticipated visual stimulus induce aberrant knee kinematics and kinetics that increase  
52  
53 97 the risk of injury[31].  
54

55  
56 98 To date, studies investigating the cortical alterations during movement of ACL patients focussed on  
57  
58 99 simple, anticipated tasks mainly requiring feedback control and assessed in sitting or lying  
59  
60

1  
2  
3 100 position[22–25]. Such tasks have poor ecological validity as they do not mimic sport-specific  
4 101 movement characteristics. Our planned trial, therefore, aims to gain further insight into the cortical and  
5 102 biomechanical processes associated with anticipated/ pre-planned vs. unanticipated/ unforeseen single-  
6 103 leg jump landings in ACL-reconstructed individuals and healthy controls. Specifically, the hypothesis  
7 104 will be tested that, ACL-reconstructed individuals compared to control individuals' exhibit increased  
8 105 cortical motor planning prior jumping. Furthermore, we assume that this higher use of cerebral  
9 106 resources will be associated with a lower landing quality in ACL reconstructed individuals.  
10  
11  
12  
13  
14  
15  
16  
17  
18

## 19 108 **2. Methods**

### 20 109 **2.1 Study design and ethical standard**

21 110 An explorative case-control study will be conducted. The trial will be carried out according to the  
22 111 Guidelines for Good Clinical Practice and according to the Declaration of Helsinki, including its  
23 112 modification of Fortaleza. Ethical approval has been obtained by the local committee of the university  
24 113 (Ethics Committee of the Faculty of Psychology and Sport Sciences, Goethe University Frankfurt,  
25 114 Germany, reference no: 2017/27) and all participants provide written informed consent. The study has  
26 115 been prospectively registered at clinicaltrials.gov (NCT03336060).  
27  
28  
29  
30  
31  
32  
33  
34  
35  
36

### 37 117 **2.2 Study setup**

38 118 After study enrollment, each individual will be scheduled for two visits within one week (Figure 1). At  
39 119 visit 1, potential confounders (for details see 2.6.3) are assessed. Subsequently, participants will be  
40 120 familiarized with the anticipated and unanticipated jump-landing tasks of the study. At visit 2, the  
41 121 main measurements are performed. Both visits will take place at comparable time of day.  
42  
43  
44  
45  
46  
47  
48

### 49 123 **Figure 1**

50 124

### 51 125 **2.3 Sample**

52 126 Recruited participants will be ACL-reconstructed (cases) and healthy, uninjured individuals (controls).  
53 127 All participants will be recruited at local physical rehabilitation centres, physiotherapists and medical  
54  
55  
56  
57  
58  
59  
60

1  
2  
3 128 practices, sports clubs, fitness centres, and the local university's sports campus by means of flyers, e-  
4  
5 129 mails and personal addressing. Inclusion criteria for all participants are (1) male sex, (2) age between  
6  
7 130 20 and 40 years, and (3) engagement in regular physical activity. Cases will be included if they have a  
8  
9 131 history of unilateral, anterior cruciate ligament rupture with reconstruction surgery (> 1 year),  
10  
11 132 irrespective of the graft used for reconstruction and surgical procedure, and full clearance to return to  
12  
13 133 sport provided by the treated physician. The following exclusion criteria will be applied:

- 14 134     ▪ exorbitant concomitant knee injury (i.e. bone bruise grad 3 or 4, full-thickness articular  
15  
16 135     cartilage lesion larger than 1 cm<sup>2</sup>, "unhappy triad") (cases)
- 17  
18 136     ▪ previous ACL-injury or surgery of the uninvolved knee (cases)
- 19  
20 137     ▪ life-quality impairing somatic/ psychological diseases/ disorders (all participants)
- 21  
22 138     ▪ acute or chronic inflammation/ disorders/ pain of the musculoskeletal system (all participants)
- 23  
24 139     ▪ medication modifying pain perception and proprioception (all participants)
- 25  
26 140     ▪ muscle soreness (all participants)
- 27  
28 141     ▪ any severe musculoskeletal injury of the lower limb (controls)
- 29  
30 142     ▪ history of head injuries (i.e. concussions)
- 31

32  
33 143

#### 34 144 **2.4 Patient and Public Involvement**

35  
36 145 Patients will be not involved in this study: We only include ACL-reconstructed individuals (minimum  
37  
38 146 one year after surgery) who have returned to their initial daily, physical and sportive activities and  
39  
40 147 have restored their neuromuscular performance of the injured lower leg indicated by a side symmetry  
41  
42 148 of single leg hop for distance testing above 85 percent. Achieving a ratio of at least 85% is  
43  
44 149 recommended before return to unrestricted sport activities[32] as a lower limb asymmetry increases  
45  
46 150 the risk for re-injury[33].

47  
48 151

#### 49 152 **2.5 Experimental approach**

50  
51  
52 153 All participants will perform repetitive counter-movement jumps (hands placed at the hip) with single  
53  
54 154 leg landings. Two different conditions are to be completed: anticipated vs. unanticipated landings. For  
55  
56 155 the anticipated condition, the participants receive a visual information depicting the requested landing

1  
2  
3 156 leg prior to the jump. In the unanticipated condition, this information will be provided only after take-  
4  
5 157 off. After a brief standardised warm-up (30 jumping jacks) and three test jumps, all participants have  
6  
7 158 to perform a total of 70 successful jumps ( $n = 35$  per condition), using the above described paradigm.  
8  
9 159 Pilot data indicated that a number of 35 successful trials per condition (5-minute breaks in sitting  
10  
11 160 position after each 10 trials) are sufficient in order to produce stable results (neural correlates of motor  
12  
13 161 planning; EEG) without evoking measurable exhaustion in any assessed parameter.

14  
15 162 The indication of the requested landing leg will be delivered by means of a laptop screen (17 inch  
16  
17 163 diameter). It is positioned at 2.5 meters distance in front of the participants (Figure 2). On the screen, a  
18  
19 164 slide (Microsoft PowerPoint 2010) with a left or right footprint located on the left or right side of a  
20  
21 165 vertical line is shown (Figure 2).

#### 22 166 **Figure 2**

23  
24 167 In anticipated trials, the slide indicating the landing leg will be presented constantly before take-off  
25  
26 168 (for details, refer to Figure 3).

#### 27 169 **Figure 3**

28  
29  
30 170 For the unanticipated jumps, a single button USB switch (KKmoon; South Africa) connected to the  
31  
32 171 laptop will be used in order to elicit a slide change (120 ms delay) from the fixation cross to the  
33  
34 172 landing leg slide upon take-off (for details, refer to Figure 4; supplementary file – Video).

#### 35 173 **Figure 4**

36  
37  
38 174 A successful jump is defined as holding a stable landing position for at least 10 seconds. The  
39  
40 175 participants will be allowed to use their arms to equilibrate the postural sway immediately after  
41  
42 176 landing. After landing, their hands need to be re-positioned on the hip, while focussing a cross on the  
43  
44 177 wall at eye level. Unsuccessful trials are categorised as landing errors (touching the ground with the  
45  
46 178 free leg, leaving the force plate, touching the ground with the hands and falls) and/or task errors  
47  
48 179 (landing on the wrong foot). To prevent excessive exhaustion during the experiment, the 70 jumps will  
49  
50 180 be stratified into blocks of 10 with 5-minutes rests (sitting position) in between. Randomised selection  
51  
52 181 of the jump conditions will be performed using BIAS for windows (University Frankfurt, Germany,  
53  
54 182 Version 11.06).

1  
2  
3 183 Previous pilot testing revealed longer flight times for unanticipated jump-landings compared to  
4  
5 184 anticipated landings. Therefore, two strategies will be used to ensure uniform flight durations between  
6  
7 185 the two disposed conditions. Firstly, during the familiarisation session, the participants will be trained  
8  
9 186 to constantly achieve comparable flight times of 480 to 520 milliseconds regardless of the jump  
10  
11 187 condition. This duration, corresponding to a jumping height of about 30 cm, was chosen because the  
12  
13 188 button switch has a latency of 120 ms from release to slide appearance and because other similar trials  
14  
15 189 have used flight times of 400 ms[34, 35]. Secondly, in addition to the task familiarisation, during the  
16  
17 190 breaks of the actual experiment, the participants will be provided with feedback regarding the achieved  
18  
19 191 flight heights. All participants are required to wear sports clothes (t-shirt and shorts) and indoor sports  
20  
21 192 shoes during both task familiarisation session, and the actual jump landing experiment.  
22  
23 193

## 24 194 **2.6 Measurements**

25  
26 195 Cortical measures of motor planning and preparation affordances serve as the main outcome of the  
27  
28 196 trial. They were assessed prior to jumping. To ensure self-initiated movements the start of the jump is  
29  
30 197 not triggered to an external stimulus in both jump-landing conditions. To reduce artefacts generated by  
31  
32 198 eye movements, participants are asked to fixate the cross (Figure 3 and 4) shown on the laptop screen  
33  
34 199 prior to jumping.  
35  
36 200

### 37 38 201 2.6.1 Cortical activity

39  
40 202 Brain activity prior to jump movement initiation will be captured using a 32-channel  
41  
42 203 electroencephalography (EEG) system with a wireless amplifier (LiveAmp, BrainProducts, Gilching,  
43  
44 204 Germany). The device samples data at a frequency of 500 Hz (24-bit analog-to-digital) and has an  
45  
46 205 integrated 3-axis acceleration sensor (measurement range:  $\pm 2$  g, Resolution: 1 mg/bit, 12 Bit; Error:  $\pm$   
47  
48 206 200 grams). It is carried in a custom-made backpack (700 grams), which is attached to the upper back  
49  
50 207 of the participants. It is equipped with a power bank to guarantee permanent power supply of the  
51  
52 208 amplifier (200 grams). Positioning of the active slim electrodes embedded in the EEG cap (actiCAP,  
53  
54 209 Easycap, Herrsching, Germany) will be performed according to the 10-20 international system[36].  
55  
56 210 Impedance will be kept below 5 k $\Omega$  and no online filters will be applied.  
57  
58  
59  
60

1  
2  
3 211 The EEG signal will be recorded throughout the whole jump landing experiment. In addition, EEG  
4  
5 212 data will be collected during 2-minute sitting rests prior to and after the 70 successful jumps. To  
6  
7 213 reduce artefacts resulting from eye movements during these measurements, the participants will be  
8  
9 214 instructed to fixate a cross, which is displayed on the laptop screen.

10  
11 215 Three EEG parameters will be analysed: *Movement related cortical potentials, frequency power*  
12  
13 216 *spectra and functional connectivity*. The **Movement-related cortical potentials** (MRCP) occur about  
14  
15 217 two seconds prior to voluntary movement and can be subdivided into successive three parts that will  
16  
17 218 be assessed in the planned trial: *Bereitschaftspotential - negative slope - motor potential* [37, 38] (for  
18  
19 219 a review see[39]). The *Bereitschaftspotential* is a slowly rising, bilateral negativity, generated in the  
20  
21 220 supplementary and pre-supplementary motor area (1.5 to 0.5 seconds before movement onset;[40,  
22  
23 221 41]). Subsequently, a steeper negativity, the *negative slope* occurs and relates to the activity of the  
24  
25 222 contralateral primary motor cortex (starting about 0.5 seconds prior to movement onset;[38, 42]). Both  
26  
27 223 signals are followed by the *motor potential*[41], the peak negativity corresponding to the movement  
28  
29 224 onset itself[43, 44]. MCRP are thought to reflect the motor cortical involvement during motor  
30  
31 225 planning and preparing of a self-initiated movement[42]. For each of the MRCP measures, acceptable  
32  
33 226 test-retest reliability has been reported[45].

34  
35 227 To investigate the attentional and working memory processes needed for initiating and executing the  
36  
37 228 jumps different **frequency power spectra** (Theta, Beta and Alpha) will be captured for frontal, central  
38  
39 229 and parietal brain areas. Theta power will be measured in the frontal cortex and increases with higher  
40  
41 230 levels of focused attention[46]. Alpha-2 power; inversely related to the activation[47] of the  
42  
43 231 underlying somatosensory cortex, decreases with higher demands of sensory information-processing  
44  
45 232 during sensorimotor tasks[23]. Both frontal Theta and parietal Alpha-2 have been shown to be  
46  
47 233 strongly associated with working memory load[48]. It is, furthermore, well-known that the planning  
48  
49 234 and preparation of voluntary movements are accompanied by an event-related desynchronization[49,  
50  
51 235 50] of the alpha and beta (including sensorimotor rhythm[51]) frequencies power corresponding to the  
52  
53 236 parietal and sensorimotor areas[52–56]. EEG power measures have been demonstrated to be highly  
54  
55 237 reliable during both rest[57] and sensorimotor tasks[58].  
56  
57  
58  
59  
60



1  
2  
3 238 Coherence analyses will be applied to examine the **functional connectivity** between the brain region  
4  
5 239 specific co-working processes (motor planning areas; fronto-parietal network[48]). Following the  
6  
7 240 approach of Sauseng et al.[48] and Silva et al.[59] coherence analysis will be conducted for the above  
8  
9 241 mentioned frequency bands (e.g. Theta, Beta and Alpha). The test-retest-reliability of coherence  
10  
11 242 testing has been shown to be sufficient to high for most brain areas and frequency bands[60].  
12  
13 243

#### 14 244 2.6.2 Biomechanical parameters

15  
16 245 A capacitive force measurement platform (50 Hz, Zebris FDM, Zebris Medical GmbH, Isny,  
17  
18 246 Germany) will be used to assess postural stability following the single leg landings. Three parameters  
19  
20 247 will be investigated: *Time to stabilisation (TTS)* - *Vertical peak ground reaction force (GRF)* - *Center*  
21  
22 248 *of pressure (COP) path length*. **Time to stabilisation (TTS)** describes the capacity to regain a stable  
23  
24 249 stance as quickly as possible. It will be computed according to Colby et al.[61] and Wikstrom et  
25  
26 250 al.[62]. Here, the dynamic cumulative average weight is calculated, based on the continuous force  
27  
28 251 plate recordings until 10 seconds after landing. A stable stance is assumed as soon as the sequential  
29  
30 252 average no longer exceeds the threshold of .25 standard deviations of the overall mean ground vertical  
31  
32 253 force. The TTS has been demonstrated to exhibit moderate to high reliability[63]. **Vertical peak**  
33  
34 254 **ground reaction force (GRF)** is the maximal vertical force impact upon landing. Using the raw data,  
35  
36 255 the highest value [Newton] will be identified. **Center of pressure (COP) path length** represents the  
37  
38 256 absolute cumulative sway of the total covered distance by the COP during the trial duration[64]. The  
39  
40 257 path length will be assessed up until 2.5 seconds after the initial ground contact, which corresponds to  
41  
42 258 the duration of the early dynamic landing phase[65]. In terms of balance assessment, COP measures  
43  
44 259 have been demonstrated satisfactory reliability[66]. Intra-individual mean values will be calculated for  
45  
46 260 TTS, peak GRF, and COP path length in dependence of the disposed conditions.  
47  
48 261

#### 49 50 262 2.6.3 Potential confounders

51  
52 263 The following parameters, potentially affecting the biomechanical and cortical outcomes, will be  
53  
54 264 assessed and analysed for their confounding influence:

- 55  
56 265 - Dynamic stability feed-forward performance of the lower limb (Single leg hop for distance;[67]).  
57  
58  
59  
60

- 1  
2  
3 266 - Postural control during single-leg stance (capacitive force measurement plate Zebris PDMS,  
4 Zebris, Isny, Germany)  
5 267  
6 268 - Limb alignment in frontal plane evaluated by using Single-Leg Landing Error Scoring  
7 System[68]  
8 269  
9 270 - Cognitive function (Visuoperceptual abilities - Trail Making Test A[69]; Simple/ Choice reaction  
10 speed – Detection/ Identification Task[70]; Working memory – Verbal digit span test[71]; Spatial  
11 271  
12 working memory/ learning efficiency – Groton Maze Learning Test[72]; Cognitive flexibility -  
13 272  
14 Tail Making Test – B[69]; Response inhibition - Stop-Signal-Task[73]; Response interference  
15 273  
16 control - Stroop Colour-Word task[74])  
17 274  
18 275 - Current and former physical/sports activities (i.e. primary sport, frequency/ duration per week,  
19 276  
20 performance level, and years of experience)  
21 277  
22 - Self-reported knee function (Lysholm Knee Score Scale[75])  
23 278  
24 - Self-reported perceived fatigue of the lower limbs (10 cm VAS)  
25 279  
26 - Kinesiophobia, or fear of movement/ (re-)injury (Tampa Scale for Kinesiophobia[76])  
27 280  
28 - Task-specific fear of movement/reinjury (10 cm VAS)  
29 281  
30 - Level of arousal and alertness (10 cm VAS)  
31 282  
32 - Risk-taking behaviour (domain-specific risk-taking/ DOSPERT scale;[77])  
33  
34  
35  
36  
37  
38  
39  
40  
41  
42  
43  
44  
45  
46  
47  
48  
49  
50  
51  
52  
53  
54  
55  
56  
57  
58  
59  
60

## 283 2.7 EEG data processing

284 All EEG data will be filtered with a Butterworth high-pass filter of .001 Hz (24 dB/octave) and a low-  
285 pass filter of 40 Hz (24 dB/octave). For movement onset detection, the accelerometer data of the  
286 amplifier are used. In each jump trial, the EEG signals will be segmented into epochs of 2500 ms,  
287 from 2.000 ms before to 500 ms after movement onset. Components which are associated with eye  
288 movements and blinks will be removed by using Independent Component Analysis according to  
289 Winkler et al.[78]. Artefact removal will be applied according to the criteria used by Saliassi et al.[79]  
290 by using automated artefact rejection. Afterwards, all segments will be also visually inspected and  
291 trials with remaining artefacts (i.e. eye blinks, movement artefact) will be removed. Only artefact-free  
292 trials will be used for analysis.

293 Time-domain specific analysis will be conducted to investigate the MRCP prior each jump. According  
294 to Spring et al.[43], MRCP will be divided into 3 successive epochs as follows: The  
295 Bereitschaftspotential divided in an early (BP-1: -1.500 to -1.000 ms) and late component (BP-2: -  
296 1.000 to -500 ms), and the negative slope component (-500 ms to 0 ms), including the motor potential.  
297 The mean and peak activity as well as onset time of the MRCP will be calculated primarily for the  
298 fronto-central (FC1, FC2) and central electrodes (C3, Cz, C4) as these channels correspond mainly to  
299 the supplementary and primary motor areas.

300 Frequency domain (spectral) analysis will be conducted by means of Fast Fourier Transformation  
301 dividing artefact-free epochs into the frequency power spectra for both measurement at rest  
302 (continuous EEG) and during the jump landing experiment. For the latter, in terms of time-frequency  
303 analysis, the 1.5 second EEG prior to movement onset will be separated into three successive 0.5  
304 second epochs: -1.500 ms to -1.000 ms (T1), -1.000 s to -500 ms (T2) and -500 ms to 0 ms (T3).  
305 According to the literature, the mean frequency power will be mainly analysed for the frontal theta  
306 (Fz;[80]), central beta (C3, Cz, C4) and parietal alpha-2 (P3, Pz, P4). Finally, to examine functional  
307 connectivity, coherence analysis in the respective frequency bands will be applied[81]. All  
308 electrocortical outcomes will be calculated for each condition (anticipated/ unanticipated,  
309 injured/uninjured leg). The EEG at rest measurements will be considered as control condition. All

1  
2  
3 310 EEG data processing will be applied by using the BrainVision Analyzer software (Brain Products,  
4  
5 311 Gilching, Germany)

## 6 7 312 **2.8 Statistics**

8  
9 313 All calculations will be performed after checking the underlying assumptions for parametric or  
10  
11 314 nonparametric testing (Shapiro-Wilk normality test for testing of normal distribution, Levene-test for  
12  
13 315 variance homogeneity testing). The EEG outcome measures will be transformed to normalize  
14  
15 316 distributions by using logarithmic based or arcsine transformation, if indicated. Data will be reported  
16  
17 317 descriptively as means, standard deviations, and 95 % confidence intervals. Potential systematic  
18  
19 318 differences between cases and controls (between-subject factors) and within both groups (within-  
20  
21 319 subject factors) will be identified in dependence of jumping condition (anticipated, unanticipated, left  
22  
23 320 and right landing leg) by using interference statistics. The relationships between the cortical activity  
24  
25 321 and biomechanical measures will be analysed by means of correlation analyses. The influence of the  
26  
27 322 potential confounders on cortical and biomechanical outcomes during the jump landing task will be  
28  
29 323 determined by correlation analysis, likewise. If statistical associations occur, significant confounders  
30  
31 324 will be considered by means of cofactor analysis. To maintain homogeneity, participants of both  
32  
33 325 groups will be matched based on age, jump performance, and their current physical/ sports activities  
34  
35 326 (open- vs. closed skill sports[82].

36  
37 327 The level of statistical significance is set to  $\alpha < .05$ . Based on the exploratory nature of this study no  
38  
39 328 alpha-error adjustment will be performed for multiple hypotheses testing. Microsoft Excel 2010 for  
40  
41 329 Windows and SPSS Statistics (version 24.0, SPSS Inc., Chicago, IL, USA) will be used for statistical  
42  
43 330 data analysis.

44  
45 331

## 46 47 332 **3. Discussion**

48  
49 333 To the best of our knowledge, the planned study is the first to explore both, the cortical and  
50  
51 334 biomechanical fundamentals underlying unanticipated single-leg landings in ACL-reconstructed  
52  
53 335 individuals. Hence, this study will provide the first evidence concerning neural correlates of motor  
54  
55 336 planning within sport- and injury-relevant movement paradigms.

1  
2  
3 337 Another strength of our design consists in the standardized assessment of relevant confounders  
4  
5 338 potentially influencing the chosen outcomes. This, particularly, relates to cognitive functions, which  
6  
7 339 have been identified to be associated with athletic performance (e.g. ball game sports[83, 84]) as well  
8  
9 340 as knee injury risk[85] and incidence[86–88].

10  
11 341 Our study will reveal results relevant for practice. If the hypothesized association between increased  
12  
13 342 use of motor planning capacities and lower postural control during landing are verified, this would  
14  
15 343 have major implications for rehabilitation. Three key aspects may be of particular relevance: Above all  
16  
17 344 (1), an increased reliance on motor planning during athletic high-risk situations could represent a new  
18  
19 345 factor predisposing for ACL (re-)injury. Future prospective observational studies may therefore  
20  
21 346 include unanticipated jump-landing tasks in order to elucidate its value in predicting injury and  
22  
23 347 monitoring the return to play / return to sports process.

24  
25 348 Another issue (2) relates to the elaboration of new training approaches. In addition to physical  
26  
27 349 exercise, e.g. dynamic balance, dual/-multi task training approaches (including external focus) and  
28  
29 350 visual-motor exercise paradigms[8], electrophysiological methods, such as neuromuscular electrical  
30  
31 351 stimulation[89], transcutaneous electrical nerve stimulation[90], electromyography biofeedback[91]  
32  
33 352 and transcranial magnet stimulation[92] may represent intriguing options to restore somatosensory  
34  
35 353 function and quadriceps corticomotor excitability of ACL-reconstructed individuals. Their application  
36  
37 354 may open new therapeutic avenues, if changes in motor planning prior to unanticipated jump landings  
38  
39 355 could be evidenced in the cases.

40  
41 356 Finally (3), affordable devices for daily practice would be needed to assess an individuals' ability to  
42  
43 357 react and properly adjust his motor plan to an unforeseen/ unanticipated external visual stimulus.

44  
45 358 Despite the promising approach, some limitations have to be taken into account. No investigator nor  
46  
47 359 participant blinding is possible using a quasi-experimental approach. Moreover, the neural correlates  
48  
49 360 of motor planning are only detectable prior to the jump, but not after take-off due to serious EEG  
50  
51 361 artefacts caused by the jump. Female athletes are at higher risk for non-contact ACL injuries compared  
52  
53 362 to their male counterparts[93, 94]. To exclude the influences due to this variable only participants of  
54  
55 363 one sex will be considered for inclusion. Males are chosen because pilot testing indicated that those  
56  
57 364 were more likely to achieve the required jump height. The study results will refer to successful

1  
2  
3 365 landings only. However, unsuccessful trials (i.e. task errors) may provide additional information in  
4  
5 366 terms of predicting injury risk. It could therefore be useful to investigate if cortical activities differ  
6  
7 367 between successful and unsuccessful trials. This would certainly require a considerable increase of the  
8  
9 368 total number of jump landings in order to obtain a sufficient amount of error trials for EEG analysis.  
10  
11 369 Due to the considerably increased risk of fatigue and a greater effort for the participants resulting from  
12  
13 370 this, adaption to the described paradigm may be the second step and should be performed after  
14  
15 371 proving the feasibility of the current approach.  
16  
17  
18  
19  
20  
21  
22  
23  
24  
25  
26  
27  
28  
29  
30  
31  
32  
33  
34  
35  
36  
37  
38  
39  
40  
41  
42  
43  
44  
45  
46  
47  
48  
49  
50  
51  
52  
53  
54  
55  
56  
57  
58  
59  
60

## References

- 1 Arna Risberg M, Lewek M, Snyder-Mackler L. A systematic review of evidence for anterior cruciate ligament rehabilitation: How much and what type? *Physical Therapy in Sport* 2004;5(3):125–45.
- 2 Spindler KP, Wright RW. Clinical practice. Anterior cruciate ligament tear. *N Engl J Med* 2008;359(20):2135–42.
- 3 Joseph AM, Collins CL, Henke NM, et al. A multisport epidemiologic comparison of anterior cruciate ligament injuries in high school athletics. *J Athl Train* 2013;48(6):810–17.
- 4 Risberg MA, Holm I, Tjomsland O, et al. Prospective study of changes in impairments and disabilities after anterior cruciate ligament reconstruction. *The Journal of orthopaedic and sports physical therapy* 1999;29(7):400–12.
- 5 Khan T, Alvand A, Prieto-Alhambra D, et al. ACL and meniscal injuries increase the risk of primary total knee replacement for osteoarthritis: A matched case-control study using the Clinical Practice Research Datalink (CPRD). *Br J Sports Med* 2018.
- 6 Paterno MV, Rauh MJ, Schmitt LC, et al. Incidence of Second ACL Injuries 2 Years After Primary ACL Reconstruction and Return to Sport. *Am J Sports Med* 2014;42(7):1567–73.
- 7 Wiggins AJ, Grandhi RK, Schneider DK, et al. Risk of Secondary Injury in Younger Athletes After Anterior Cruciate Ligament Reconstruction: A Systematic Review and Meta-analysis. *Am J Sports Med* 2016;44(7):1861–76.
- 8 Grooms D, Appelbaum G, Onate J. Neuroplasticity following anterior cruciate ligament injury: A framework for visual-motor training approaches in rehabilitation. *The Journal of orthopaedic and sports physical therapy* 2015;45(5):381–93.
- 9 Pelletier R, Higgins J, Bourbonnais D. Is neuroplasticity in the central nervous system the missing link to our understanding of chronic musculoskeletal disorders? *BMC Musculoskeletal Disord* 2015;16:25.
- 10 Dhillon MS, Bali K, Prabhakar S. Differences among mechanoreceptors in healthy and injured anterior cruciate ligaments and their clinical importance. *Muscles Ligaments Tendons J* 2012;2(1):38–43.
- 11 Dhillon MS, Bali K, Prabhakar S. Proprioception in anterior cruciate ligament deficient knees and its relevance in anterior cruciate ligament reconstruction. *Indian J Orthop* 2011;45(4):294–300.
- 12 Schultz RA, Miller DC, Kerr CS, et al. Mechanoreceptors in human cruciate ligaments. A histological study. *J Bone Joint Surg Am* 1984;66(7):1072–76.
- 13 Çabuk H, Kuşku Çabuk F. Mechanoreceptors of the ligaments and tendons around the knee. *Clin Anat* 2016;29(6):789–95.
- 14 Tsuda E, Okamura Y, Otsuka H, et al. Direct evidence of the anterior cruciate ligament-hamstring reflex arc in humans. *Am J Sports Med* 2001;29(1):83–87.
- 15 Tsuda E, Ishibashi Y, Okamura Y, et al. Restoration of anterior cruciate ligament-hamstring reflex arc after anterior cruciate ligament reconstruction. *Knee Surg Sports Traumatol Arthrosc* 2003;11(2):63–67.
- 16 Beard DJ, Kyberd PJ, Fergusson CM, et al. Proprioception after rupture of the anterior cruciate ligament. An objective indication of the need for surgery? *J Bone Joint Surg Br* 1993;75(2):311–15.
- 17 Blackburn JT, Norcross MF, Padua DA. Influences of hamstring stiffness and strength on anterior knee joint stability. *Clin Biomech (Bristol, Avon)* 2011;26(3):278–83.
- 18 Solomonow M, Baratta R, Zhou BH, et al. The synergistic action of the anterior cruciate ligament and thigh muscles in maintaining joint stability. *Am J Sports Med* 1987;15(3):207–13.
- 19 Kapreli E, Athanasopoulos S. The anterior cruciate ligament deficiency as a model of brain plasticity. *Med. Hypotheses* 2006;67(3):645–50.
- 20 Ward S, Pearce AJ, Pietrosimone B, et al. Neuromuscular deficits after peripheral joint injury: A neurophysiological hypothesis. *Muscle & nerve* 2015;51(3):327–32.

- 1  
2  
3 21 Needle AR, Lепley AS, Grooms DR. Central Nervous System Adaptation After Ligamentous  
4 Injury: A Summary of Theories, Evidence, and Clinical Interpretation. *Sports Med*  
5 2017;47(7):1271–88.
- 6 22 Baumeister J, Reinecke K, Schubert M, et al. Altered electrocortical brain activity after ACL  
7 reconstruction during force control. *J. Orthop. Res.* 2011;29(9):1383–89.
- 8 23 Baumeister J, Reinecke K, Weiss M. Changed cortical activity after anterior cruciate ligament  
9 reconstruction in a joint position paradigm: an EEG study. *Scand J Med Sci Sports*  
10 2008;18(4):473–84.
- 11 24 Grooms DR, Page SJ, Onate JA. Brain Activation for Knee Movement Measured Days Before  
12 Second Anterior Cruciate Ligament Injury: Neuroimaging in Musculoskeletal Medicine. *J Athl*  
13 *Train* 2015;50(10):1005–10.
- 14 25 Kapreli E, Athanasopoulos S, Gliatis J, et al. Anterior cruciate ligament deficiency causes brain  
15 plasticity: A functional MRI study. *Am J Sports Med* 2009;37(12):2419–26.
- 16 26 Ball T, Schreiber A, Feige B, et al. The role of higher-order motor areas in voluntary movement  
17 as revealed by high-resolution EEG and fMRI. *Neuroimage* 1999;10(6):682–94.
- 18 27 Geisler PR, Needle AR, Rosen AB. Ligament Injury Changes Brain Function: Now Let's Think  
19 About It. *Athletic Training & Sports Health Care* 2017;9(5):198–99.
- 20 28 Grooms DR, Onate JA. Neuroscience Application to Noncontact Anterior Cruciate Ligament  
21 Injury Prevention. *Sports Health* 2015.
- 22 29 Swanik CB. Brains and Sprains: The Brain's Role in Noncontact Anterior Cruciate Ligament  
23 Injuries. *J Athl Train* 2015;50(10):1100–02.
- 24 30 C Herman D, Zaremski JL, Vincent HK, et al. Effect of neurocognition and concussion on  
25 musculoskeletal injury risk. *Curr Sports Med Rep* 2015;14(3):194–99.
- 26 31 Almonroeder TG, Garcia E, Kurt M. THE EFFECTS OF ANTICIPATION ON THE MECHANICS OF THE  
27 KNEE DURING SINGLE-LEG CUTTING TASKS: A SYSTEMATIC REVIEW. *Int J Sports Phys Ther*  
28 2015;10(7):918–28.
- 29 32 Barber-Westin SD, Noyes FR. Factors used to determine return to unrestricted sports activities  
30 after anterior cruciate ligament reconstruction. *Arthroscopy* 2011;27(12):1697–705.
- 31 33 Kyritsis P, Bahr R, Landreau P, et al. Likelihood of ACL graft rupture: Not meeting six clinical  
32 discharge criteria before return to sport is associated with a four times greater risk of rupture.  
33 *Br J Sports Med* 2016;50(15):946–51.
- 34 34 Brown TN, Palmieri-Smith RM, McLean SG. Sex and limb differences in hip and knee kinematics  
35 and kinetics during anticipated and unanticipated jump landings: implications for anterior  
36 cruciate ligament injury. *Br J Sports Med* 2009;43(13):1049–56.
- 37 35 McLean SG, Samorezov JE. Fatigue-induced ACL injury risk stems from a degradation in central  
38 control. *Medicine and science in sports and exercise* 2009;41(8):1661–72.
- 39 36 Klem GH, Lüders HO, Jasper HH, et al. The ten-twenty electrode system of the International  
40 Federation. The International Federation of Clinical Neurophysiology. *Electroencephalogr Clin*  
41 *Neurophysiol Suppl* 1999;52:3–6.
- 42 37 Hallett M. Movement-related cortical potentials. *Electromyogr Clin Neurophysiol* 1994;34(1):5–  
43 13.
- 44 38 Shibasaki H, Barrett G, Halliday E, et al. Components of the movement-related cortical potential  
45 and their scalp topography. *Electroencephalogr Clin Neurophysiol* 1980;49(3-4):213–26.
- 46 39 Shibasaki H, Hallett M. What is the Bereitschaftspotential? *Clin Neurophysiol*  
47 2006;117(11):2341–56.
- 48 40 KORNHUBER HH, Deecke L. HIRNPOTENTIALAENDERUNGEN BEI WILLKUERBEWEGUNGEN UND  
49 PASSIVEN BEWEGUNGEN DES MENSCHEN: BEREITSCHAFTSPOTENTIAL UND REAFFERENTE  
50 POTENTIALE. *Pflugers Arch Gesamte Physiol Menschen Tiere* 1965;284:1–17.
- 51 41 Deecke L, Scheid P, KORNHUBER HH. Distribution of readiness potential, pre-motion positivity,  
52 and motor potential of the human cerebral cortex preceding voluntary finger movements.  
53 *Experimental brain research* 1969;7(2):158–68.
- 54 42 Deecke L. Bereitschaftspotential as an indicator of movement preparation in supplementary  
55 motor area and motor cortex. *Ciba Found Symp* 1987;132:231–50.
- 56  
57  
58  
59



- 1  
2  
3 43 Spring JN, Place N, Borrani F, et al. Movement-Related Cortical Potential Amplitude Reduction  
4 after Cycling Exercise Relates to the Extent of Neuromuscular Fatigue. *Front Hum Neurosci*  
5 2016;10:257.
- 6 44 Wright DJ, Holmes PS, Di Russo F, et al. Differences in cortical activity related to motor planning  
7 between experienced guitarists and non-musicians during guitar playing. *Hum Mov Sci*  
8 2012;31(3):567–77.
- 9 45 Falvo M. Neurophysiological Adaptations to Resistance Training and Repetitive Grasping.  
10 Washington University in St. Louis 2010.
- 11 46 Doppelmayr M, Finkenzeller T, Sauseng P. Frontal midline theta in the pre-shot phase of rifle  
12 shooting: differences between experts and novices. *Neuropsychologia* 2008;46(5):1463–67.
- 13 47 Gevins A. High-resolution EEG mapping of cortical activation related to working memory:  
14 Effects of task difficulty, type of processing, and practice. *Cerebral Cortex* 1997;7(4):374–85.
- 15 48 Sauseng P, Klimesch W, Schabus M, et al. Fronto-parietal EEG coherence in theta and upper  
16 alpha reflect central executive functions of working memory. *Int J Psychophysiol*  
17 2005;57(2):97–103.
- 18 49 Pfurtscheller G, Lopes da Silva FH. Event-related EEG/MEG synchronization and  
19 desynchronization: Basic principles. *Clin Neurophysiol* 1999;110(11):1842–57.
- 20 50 Pfurtscheller G, Andrew C. Event-Related changes of band power and coherence: Methodology  
21 and interpretation. *J Clin Neurophysiol* 1999;16(6):512–19.
- 22 51 Cheng M-Y, Hung C-L, Huang C-J, et al. Expert-novice differences in SMR activity during dart  
23 throwing. *Biol Psychol* 2015;110:212–18.
- 24 52 Babiloni C, Carducci F, Cincotti F, et al. Human movement-related potentials vs  
25 desynchronization of EEG alpha rhythm: A high-resolution EEG study. *Neuroimage*  
26 1999;10(6):658–65.
- 27 53 Kaiser J, Birbaumer N, Lutzenberger W. Event-related beta desynchronization indicates timing  
28 of response selection in a delayed-response paradigm in humans. *Neuroscience Letters*  
29 2001;312(3):149–52.
- 30 54 Deiber M-P, Sallard E, Ludwig C, et al. EEG alpha activity reflects motor preparation rather than  
31 the mode of action selection. *Front Integr Neurosci* 2012;6:59.
- 32 55 Tzagarakis C, Ince NF, Leuthold AC, et al. Beta-band activity during motor planning reflects  
33 response uncertainty. *J Neurosci* 2010;30(34):11270–77.
- 34 56 Zaepffel M, Trachel R, Kilavik BE, et al. Modulations of EEG beta power during planning and  
35 execution of grasping movements. *PLoS one* 2013;8(3):e60060.
- 36 57 Gudmundsson S, Runarsson TP, Sigurdsson S, et al. Reliability of quantitative EEG features. *Clin*  
37 *Neurophysiol* 2007;118(10):2162–71.
- 38 58 Baumeister J, Reinecke K, Schubert M, et al. Effects of induced fatigue on brain activity during  
39 sensorimotor control. *Eur J Appl Physiol* 2012;112(7):2475–82.
- 40 59 Silva F, Arias-Carrión O, Teixeira S, et al. Functional coupling of sensorimotor and associative  
41 areas during a catching ball task: A qEEG coherence study. *Int Arch Med* 2012;5:9.
- 42 60 Roberts A, Fillmore P, Decker S. Clinical Applicability of the Test-retest Reliability of qEEG  
43 Coherence. *NR* 2016;3(1):7–22.
- 44 61 Colby SM, Hintermeister RA, Torry MR, et al. Lower limb stability with ACL impairment. *The*  
45 *Journal of orthopaedic and sports physical therapy* 1999;29(8):444-51; discussion 452-4.
- 46 62 Wikstrom EA, Tillman MD, Smith AN, et al. A new force-plate technology measure of dynamic  
47 postural stability: the dynamic postural stability index. *J Athl Train* 2005;40(4):305–09.
- 48 63 Jensen RL. Reliability of time to stabilization in single leg standing. 2009:346–49.
- 49 64 Palmieri RM, Ingersoll CD, Stone MB, et al. Center-of-Pressure Parameters Used in the  
50 Assessment of Postural Control. *Journal of sport rehabilitation* 2002;11(1):51–66.
- 51 65 Fransz DP, Huurnink A, Boode VA de, et al. Time series of ground reaction forces following a  
52 single leg drop jump landing in elite youth soccer players consist of four distinct phases. *Gait*  
53 *Posture* 2016;50:137–44.
- 54 66 Li Z, Liang Y-Y, Wang L, et al. Reliability and validity of center of pressure measures for balance  
55 assessment in older adults. *J Phys Ther Sci* 2016;28(4):1364–67.

- 1  
2  
3 67 Logerstedt D, Grindem H, Lynch A, et al. Single-legged hop tests as predictors of self-reported  
4 knee function after anterior cruciate ligament reconstruction: The Delaware-Oslo ACL cohort  
5 study. *Am J Sports Med* 2012;40(10):2348–56.
- 6 68 O'Connor ML. The Development of the Single-Leg Landing Error Scoring System (SL-LESS) for  
7 Lower Extremity Movement Screening: Theses and Dissertations 2015.
- 8 69 Tombaugh T. Trail Making Test A and B: Normative data stratified by age and education. *Arch*  
9 *Clin Neuropsychol* 2004;19(2):203–14.
- 10 70 Maruff P, Thomas E, Cysique L, et al. Validity of the CogState brief battery: Relationship to  
11 standardized tests and sensitivity to cognitive impairment in mild traumatic brain injury,  
12 schizophrenia, and AIDS dementia complex. *Archives of clinical neuropsychology the official*  
13 *journal of the National Academy of Neuropsychologists* 2009;24(2):165–78.
- 14 71 Woods DL, Kishiyama MM, Lund EW, et al. Improving digit span assessment of short-term  
15 verbal memory. *J Clin Exp Neuropsychol* 2011;33(1):101–11.
- 16 72 Pietrzak RH, Maruff P, Mayes LC, et al. An examination of the construct validity and factor  
17 structure of the Groton Maze Learning Test, a new measure of spatial working memory,  
18 learning efficiency, and error monitoring. *Arch Clin Neuropsychol* 2008;23(4):433–45.
- 19 73 Verbruggen F, Logan GD. Response inhibition in the stop-signal paradigm. *Trends Cogn Sci*  
20 *(Regul Ed)* 2008;12(11):418–24.
- 21 74 van der Elst W, van Boxtel MPJ, van Breukelen GJP, et al. The Stroop color-word test: Influence  
22 of age, sex, and education; and normative data for a large sample across the adult age range.  
23 *Assessment* 2006;13(1):62–79.
- 24 75 Lysholm J, Gillquist J. Evaluation of knee ligament surgery results with special emphasis on use  
25 of a scoring scale. *Am J Sports Med* 1982;10(3):150–54.
- 26 76 Rusu AC, Kreddig N, Hallner D, et al. Fear of movement/(Re)injury in low back pain:  
27 Confirmatory validation of a German version of the Tampa Scale for Kinesiophobia. *BMC*  
28 *Musculoskelet Disord* 2014;15:280.
- 29 77 Blais, Ann-Renee and Weber, Elke U. A Domain-Specific Risk-Taking (DOSPERT) Scale for Adult  
30 Populations. *Judgment and Decision Making* 2006(Vol. 1, No. 1).  
31 <https://ssrn.com/abstract=1301089>.
- 32 78 Winkler I, Debener S, Müller K-R, et al. On the influence of high-pass filtering on ICA-based  
33 artifact reduction in EEG-ERP. *Conf Proc IEEE Eng Med Biol Soc* 2015;2015:4101–05.
- 34 79 Saliassi E, Geerligs L, Lorist MM, et al. The relationship between P3 amplitude and working  
35 memory performance differs in young and older adults. *PLoS one* 2013;8(5):e63701.
- 36 80 Luchsinger H, Sandbakk Ø, Schubert M, et al. A Comparison of Frontal Theta Activity During  
37 Shooting among Biathletes and Cross-Country Skiers before and after Vigorous Exercise. *PLoS*  
38 *one* 2016;11(3):e0150461.
- 39 81 Bastos AM, Schoffelen J-M. A Tutorial Review of Functional Connectivity Analysis Methods and  
40 Their Interpretational Pitfalls. *Front Syst Neurosci* 2015;9:175.
- 41 82 Di Russo F, Bultrini A, Brunelli S, et al. Benefits of sports participation for executive function in  
42 disabled athletes. *J Neurotrauma* 2010;27(12):2309–19.
- 43 83 Huijgen BC, Leemhuis S, Kok NM, et al. Cognitive Functions in Elite and Sub-Elite Youth Soccer  
44 Players Aged 13 to 17 Years. *PLoS one* 2015;10(12):e0144580.
- 45 84 Verburch L, Scherder EJ, van Lange PA, et al. Executive functioning in highly talented soccer  
46 players. *PLoS one* 2014;9(3):e91254.
- 47 85 Herman DC, Barth JT. Drop-Jump Landing Varies With Baseline Neurocognition: Implications for  
48 Anterior Cruciate Ligament Injury Risk and Prevention. *Am J Sports Med* 2016;44(9):2347–53.
- 49 86 Swanik CB, Covassin T, Stearne DJ, et al. The relationship between neurocognitive function and  
50 noncontact anterior cruciate ligament injuries. *Am J Sports Med* 2007;35(6):943–48.
- 51 87 Hutchison M, Comper P, Mainwaring L, et al. The influence of musculoskeletal injury on  
52 cognition: implications for concussion research. *Am J Sports Med* 2011;39(11):2331–37.
- 53 88 Mokha M, Wilkerson GB. Neurocognitive Reaction Time Predicts Lower Extremity Sprains and  
54 Strains. *International Journal of Athletic Therapy and Training* 2012;17(6):4–9.
- 55  
56  
57  
58  
59  
60

- 1  
2  
3 89 Mang CS, Clair JM, Collins DF. Neuromuscular electrical stimulation has a global effect on  
4 corticospinal excitability for leg muscles and a focused effect for hand muscles. *Experimental*  
5 *brain research* 2011;209(3):355–63.
- 6 90 Hart JM, Kuenze CM, Pietrosimone BG, et al. Quadriceps function in anterior cruciate ligament-  
7 deficient knees exercising with transcutaneous electrical nerve stimulation and cryotherapy: A  
8 randomized controlled study. *Clin Rehabil* 2012;26(11):974–81.
- 9 91 Pietrosimone B, McLeod MM, Florea D, et al. Immediate increases in quadriceps corticomotor  
10 excitability during an electromyography biofeedback intervention. *J Electromyogr Kinesiol*  
11 2015;25(2):316–22.
- 12 92 Gibbons CE, Pietrosimone BG, Hart JM, et al. Transcranial magnetic stimulation and volitional  
13 quadriceps activation. *J Athl Train* 2010;45(6):570–79.
- 14 93 Ireland ML. The female ACL: Why is it more prone to injury? *J Orthop* 2016;13(2):A1-4.
- 15 94 Agel J, Arendt EA, Bershadsky B. Anterior cruciate ligament injury in national collegiate athletic  
16 association basketball and soccer: A 13-year review. *Am J Sports Med* 2005;33(4):524–30.
- 17  
18  
19  
20  
21  
22  
23  
24  
25  
26  
27  
28  
29  
30  
31  
32  
33  
34  
35  
36  
37  
38  
39  
40  
41  
42  
43  
44  
45  
46  
47  
48  
49  
50  
51  
52  
53  
54  
55  
56  
57  
58  
59  
60

## Figure captions

**Figure 1:** Experimental study setup. The figure details the days in which participants are assessed.

**Figure 2:** Setup of the Jump-Landing Experiment.

*Rubber mat (1); Hinge (2); Plastic panel (3); USB-button switch (4); Force plate (5); USB-cable connecting button switch with screen (PowerPoint; 6); Laptop with screen (17 Inch diameter; 7); Powerpoint-slides demonstrated on laptop screen indicating left or right foot landing (randomised order). Before each foot slide a separate slide containing a fixation cross is demonstrated (8).*

**Figure 3:** Proceedings of anticipated jump-landings and the clarification when and how the visual stimulus indicating the side on which the single leg-landing has to be performed is presented.

*A = slide with a fixation cross; B = slide is presented before the initiation of the jump. Participants start standing in bipedal position on the plastic panel (3; Figure 2) while fixating the cross (A). The experimenter indicates the start of movement preparation by mentioning the condition “anticipated”. Simultaneously the slide demonstrating the landing leg (B) is shown. Afterwards, participants initiate the jump by their own.*

**Figure 4:** Proceedings of unanticipated jump-landings and the clarification when and how the visual stimulus indicating the side on which the single leg-landing has to be performed is presented.

*C = slide with a fixation cross (same as in A; Fig 3); D = USB-button (4, Figure 2) release during take-off (plastic panel elevates) initiating slide change; E = slide indicating the landing foot presented only after take-off. Participants start standing in bipedal position on the plastic panel (3; Figure 2) while fixating the cross (C). The experimenter mentions the jump-landing condition “unanticipated”. Afterwards, participants will initiate the jump by their own while C is still shown. The slide indicating the landing leg (E) appears about 120 milliseconds after take-off (button release; D) and is than shown continuously (for more details, refer to the supplementary video file).*

## Supplementary video file

1  
2  
3 This video demonstrates in exemplary the unanticipated jump-landing task according to the  
4 description provided in Figure 4.  
5  
6  
7  
8  
9  
10  
11  
12  
13  
14  
15  
16  
17  
18  
19  
20  
21  
22  
23  
24  
25  
26  
27  
28  
29  
30  
31  
32  
33  
34  
35  
36  
37  
38  
39  
40  
41  
42  
43  
44  
45  
46  
47  
48  
49  
50  
51  
52  
53  
54  
55  
56  
57  
58  
59  
60

**Trial status**

At the time of submission of this manuscript, recruitment is ongoing.

**Abbreviations**

ACL: Anterior cruciate ligament; COP: Center of Pressure; CNS: Central nervous system; EEG: Electroencephalography; GRF: Vertical peak ground reaction force; MRCP: Movement-related cortical potentials; TTS: Time to stabilisation; VAS: Visual analogue scale

**Funding**

No external funding.

**Conflict of interests**

The authors have nothing to disclose.

**Competing interests**

All authors have completed the ICMJE uniform disclosure form at [www.icmje.org/coi\\_disclosure.pdf](http://www.icmje.org/coi_disclosure.pdf) and declare: no support from any organisation for the submitted work; no financial relationships with any organisations that might have an interest in the submitted work in the previous three years; no other relationships or activities that could appear to have influenced the submitted work. We declare that we have no competing interests.

**Data statement**

After completion of data acquisition the dataset will be available from ResearchGate.

**Author Statement**

FG developed the jump-landing setup and selected the neurophysiological and biomechanical outcome measures. FG wrote the first draft of the manuscript, revised the manuscript and provided final approval. TE assisted FG in the development of the trial jump-landing setup and in the selection of biomechanical outcome parameters. TE revised the manuscript, provided critical review and final approval. JW assisted FG in the development of the trial jump-landing setup and in the selection of biomechanical outcome parameters. JW revised the manuscript, provided critical review and final approval. DN revised the manuscript, provided critical review and final approval. JW assisted FG in the development of the trial jump-landing setup and in the selection of biomechanical outcome parameters. DN revised the manuscript, provided critical review and final approval. LV revised the manuscript and provided intellectual contributions to the final, submitted version of the manuscript. WB revised the manuscript and provided intellectual contributions to the final, submitted version of the manuscript. The material within has not been and will not be submitted for publication elsewhere

1  
2  
3 except as an abstract. The authors agree that the copyright for our article is transferred to the publisher  
4 if and when the article is accepted for publication.  
5

### 6 7 **Acknowledgements**

8 We especially recognize the assistance of Dr. Solveig Vieluf (Sports Medicine department, University  
9 of Paderborn, Germany) in the development of the EEG setup. Furthermore, we like to thank Alwin  
10 Eifler for providing written consent for publication of his individual details and the accompanying  
11 video of this manuscript.  
12  
13

### 14 15 16 **Consent for publication**

17 Written informed consent was obtained from the participants for publication of their individual details  
18 and accompanying images/ video in this manuscript. The consent form is held by the authors and is  
19 available for review by the Editor-in-Chief.  
20  
21

### 22 23 **Ethics approval and consent to participate**

24 The study was approved by the local Ethics Committee of the Faculty of Psychology and Sport  
25 Science, Goethe-University Frankfurt (reference number: 2017/27). The trial will be carried out  
26 according to the Guidelines for Good Clinical Practice and according to the Declaration of Helsinki,  
27 including its modification of Fortaleza. All participants provide informed consent prior to study  
28 enrollment.  
29  
30  
31

### 32 33 **Trial registration**

34 The study has been registered at [clinicaltrials.gov](http://clinicaltrials.gov) (NCT03336060).  
35  
36  
37  
38  
39  
40  
41  
42  
43  
44  
45  
46  
47  
48  
49  
50  
51  
52  
53  
54  
55  
56  
57  
58  
59  
60

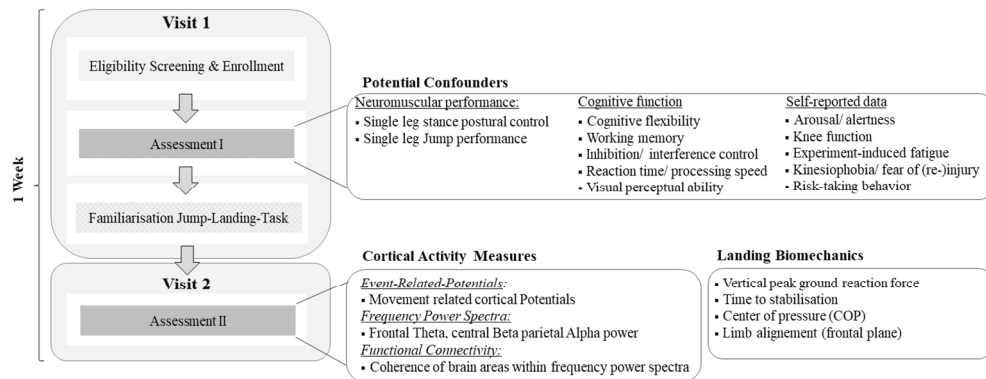

Experimental study setup. The figure details the days in which participants are assessed.

131x51mm (300 x 300 DPI)

Peer review only



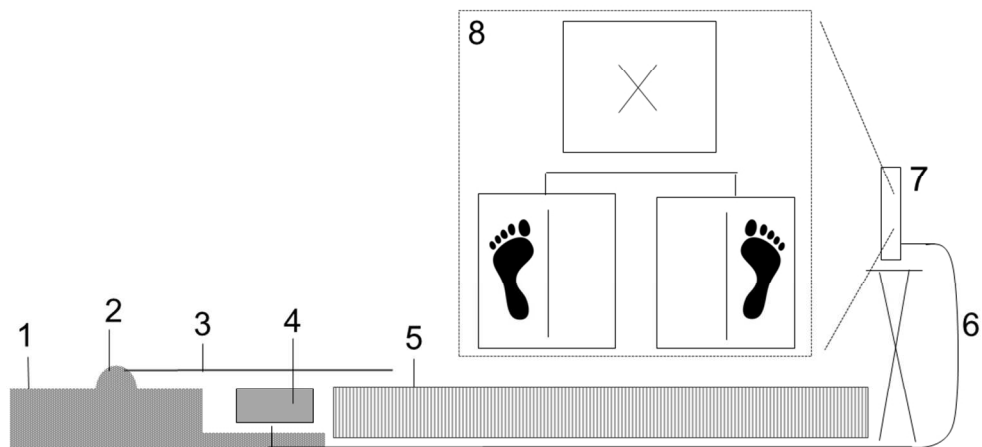

Setup of the Jump-Landing Experiment.

96x51mm (300 x 300 DPI)

review only

1  
2  
3  
4  
5  
6  
7  
8  
9  
10  
11  
12  
13  
14  
15  
16  
17  
18  
19  
20  
21  
22  
23  
24  
25  
26  
27  
28  
29  
30  
31  
32  
33  
34  
35  
36  
37  
38  
39  
40  
41  
42  
43  
44  
45  
46  
47  
48  
49  
50  
51  
52  
53  
54  
55  
56  
57  
58  
59  
60

# Anticipated

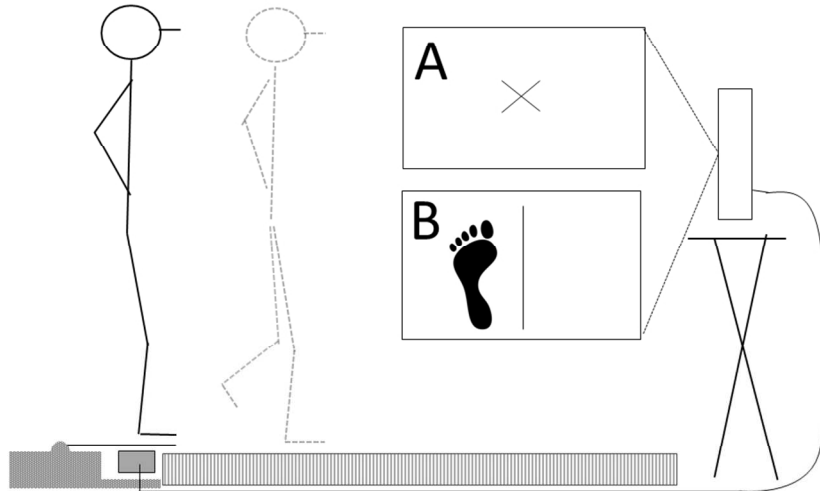

Proceedings of anticipated jump-landings and the clarification when and how the visual stimulus indicating the side on which the single leg-landing has to be performed is presented.

96x67mm (300 x 300 DPI)

Peer Review Only

## Non-anticipated

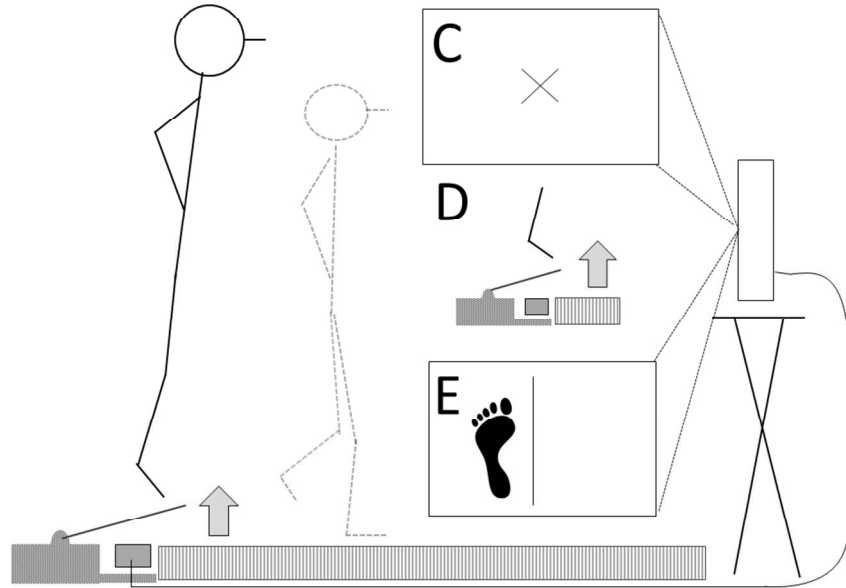

Proceedings of unanticipated jump-landings and the clarification when and how the visual stimulus indicating the side on which the single leg-landing has to be performed is presented.

96x67mm (300 x 300 DPI)

**STROBE 2007 (v4) Statement—Checklist of items that should be included in reports of *case-control studies***

| Section/Topic                | Item # | Recommendation                                                                                                                                                                       | Reported on page #    |
|------------------------------|--------|--------------------------------------------------------------------------------------------------------------------------------------------------------------------------------------|-----------------------|
| Title and abstract           | 1      | (a) Indicate the study's design with a commonly used term in the title or the abstract                                                                                               | 1, 2                  |
|                              |        | (b) Provide in the abstract an informative and balanced summary of what was done and what was found                                                                                  | 2                     |
| <b>Introduction</b>          |        |                                                                                                                                                                                      |                       |
| Background/rationale         | 2      | Explain the scientific background and rationale for the investigation being reported                                                                                                 | 3                     |
| Objectives                   | 3      | State specific objectives, including any prespecified hypotheses                                                                                                                     | 5                     |
| <b>Methods</b>               |        |                                                                                                                                                                                      |                       |
| Study design                 | 4      | Present key elements of study design early in the paper                                                                                                                              | 5                     |
| Setting                      | 5      | Describe the setting, locations, and relevant dates, including periods of recruitment, exposure, follow-up, and data collection                                                      | 5                     |
| Participants                 | 6      | (a) Give the eligibility criteria, and the sources and methods of case ascertainment and control selection. Give the rationale for the choice of cases and controls                  | 6,7                   |
|                              |        | (b) For matched studies, give matching criteria and the number of controls per case                                                                                                  | n.a.                  |
| Variables                    | 7      | Clearly define all outcomes, exposures, predictors, potential confounders, and effect modifiers. Give diagnostic criteria, if applicable                                             | 7 f.                  |
| Data sources/<br>measurement | 8*     | For each variable of interest, give sources of data and details of methods of assessment (measurement). Describe comparability of assessment methods if there is more than one group | 7 f.                  |
| Bias                         | 9      | Describe any efforts to address potential sources of bias                                                                                                                            | n.a.                  |
| Study size                   | 10     | Explain how the study size was arrived at                                                                                                                                            |                       |
| Quantitative variables       | 11     | Explain how quantitative variables were handled in the analyses. If applicable, describe which groupings were chosen and why                                                         | 12, 13                |
| Statistical methods          | 12     | (a) Describe all statistical methods, including those used to control for confounding                                                                                                | 13                    |
|                              |        | (b) Describe any methods used to examine subgroups and interactions                                                                                                                  | 13                    |
|                              |        | (c) Explain how missing data were addressed                                                                                                                                          | n.a.                  |
|                              |        | (d) If applicable, explain how matching of cases and controls was addressed                                                                                                          | n.a.                  |
|                              |        | (e) Describe any sensitivity analyses                                                                                                                                                | n.a.                  |
| <b>Results</b>               |        |                                                                                                                                                                                      | n.a. (study protocol) |

|                          |     |                                                                                                                                                                                                              |                       |
|--------------------------|-----|--------------------------------------------------------------------------------------------------------------------------------------------------------------------------------------------------------------|-----------------------|
| Participants             | 13* | (a) Report numbers of individuals at each stage of study—eg numbers potentially eligible, examined for eligibility, confirmed eligible, included in the study, completing follow-up, and analysed            | “                     |
|                          |     | (b) Give reasons for non-participation at each stage                                                                                                                                                         | “                     |
|                          |     | (c) Consider use of a flow diagram                                                                                                                                                                           | “                     |
| Descriptive data         | 14* | (a) Give characteristics of study participants (eg demographic, clinical, social) and information on exposures and potential confounders                                                                     | “                     |
|                          |     | (b) Indicate number of participants with missing data for each variable of interest                                                                                                                          | “                     |
| Outcome data             | 15* | Report numbers in each exposure category, or summary measures of exposure                                                                                                                                    | “                     |
| Main results             | 16  | (a) Give unadjusted estimates and, if applicable, confounder-adjusted estimates and their precision (eg, 95% confidence interval). Make clear which confounders were adjusted for and why they were included | “                     |
|                          |     | (b) Report category boundaries when continuous variables were categorized                                                                                                                                    | “                     |
|                          |     | (c) If relevant, consider translating estimates of relative risk into absolute risk for a meaningful time period                                                                                             | “                     |
| Other analyses           | 17  | Report other analyses done—eg analyses of subgroups and interactions, and sensitivity analyses                                                                                                               | “                     |
| <b>Discussion</b>        |     |                                                                                                                                                                                                              | 13, 14                |
| Key results              | 18  | Summarise key results with reference to study objectives                                                                                                                                                     | n.a. (study protocol) |
| Limitations              | 19  | Discuss limitations of the study, taking into account sources of potential bias or imprecision.<br>Discuss both direction and magnitude of any potential bias                                                | “                     |
| Interpretation           | 20  | Give a cautious overall interpretation of results considering objectives, limitations, multiplicity of analyses, results from similar studies, and other relevant evidence                                   | “                     |
| Generalisability         | 21  | Discuss the generalisability (external validity) of the study results                                                                                                                                        | “                     |
| <b>Other information</b> |     |                                                                                                                                                                                                              |                       |
| Funding                  | 22  | Give the source of funding and the role of the funders for the present study and, if applicable, for the original study on which the present article is based                                                | 13                    |

\*Give information separately for cases and controls in case-control studies and, if applicable, for exposed and unexposed groups in cohort and cross-sectional studies.

**Note:** An Explanation and Elaboration article discusses each checklist item and gives methodological background and published examples of transparent reporting. The STROBE checklist is best used in conjunction with this article (freely available on the Web sites of PLoS Medicine at <http://www.plosmedicine.org/>, Annals of Internal Medicine at <http://www.annals.org/>, and Epidemiology at <http://www.epidem.com/>). Information on the STROBE Initiative is available at [www.strobe-statement.org](http://www.strobe-statement.org).
